# Supplementary material for: Homoeologous non-reciprocal translocation explains a major QTL for seed lignin content in oilseed rape (Brassica napus L.)
Source: PubMed Central journal article supplement (PMC10345078; doi:10.1007/s00122-023-04407-w), 2023-07-13
Supplement: 122_2023_4407_MOESM1_ESM.pdf [file 122_2023_4407_MOESM1_ESM.pdf]

# Homoeologous non-reciprocal translocation explains a major QTL for seed lignin content in oilseed rape (*Brassica napus* L.)

Hanna Marie Schilbert<sup>1,2,†</sup>, Karin Holzenkamp<sup>3,†</sup>, Prisca Viehöver<sup>1</sup>, Daniela Holtgräwe<sup>1</sup>, Christian Möllers<sup>3</sup>

<sup>1</sup> Genetics and Genomics of Plants, CeBiTec and Faculty of Biology, Bielefeld University, Bielefeld, Germany

<sup>2</sup> Graduate School DILS, Bielefeld Institute for Bioinformatics Infrastructure (BIBI), Faculty of Technology, Bielefeld University, Germany

<sup>3</sup> Department of Crop Sciences, Division of Crop Plant Genetics, Georg-August-University, Göttingen, Germany

† These authors contributed equally to this work.

Corresponding author: Hanna Marie Schilbert; hschilbe@cebitec.uni-bielefeld.de

## Theoretical and Applied Genetics

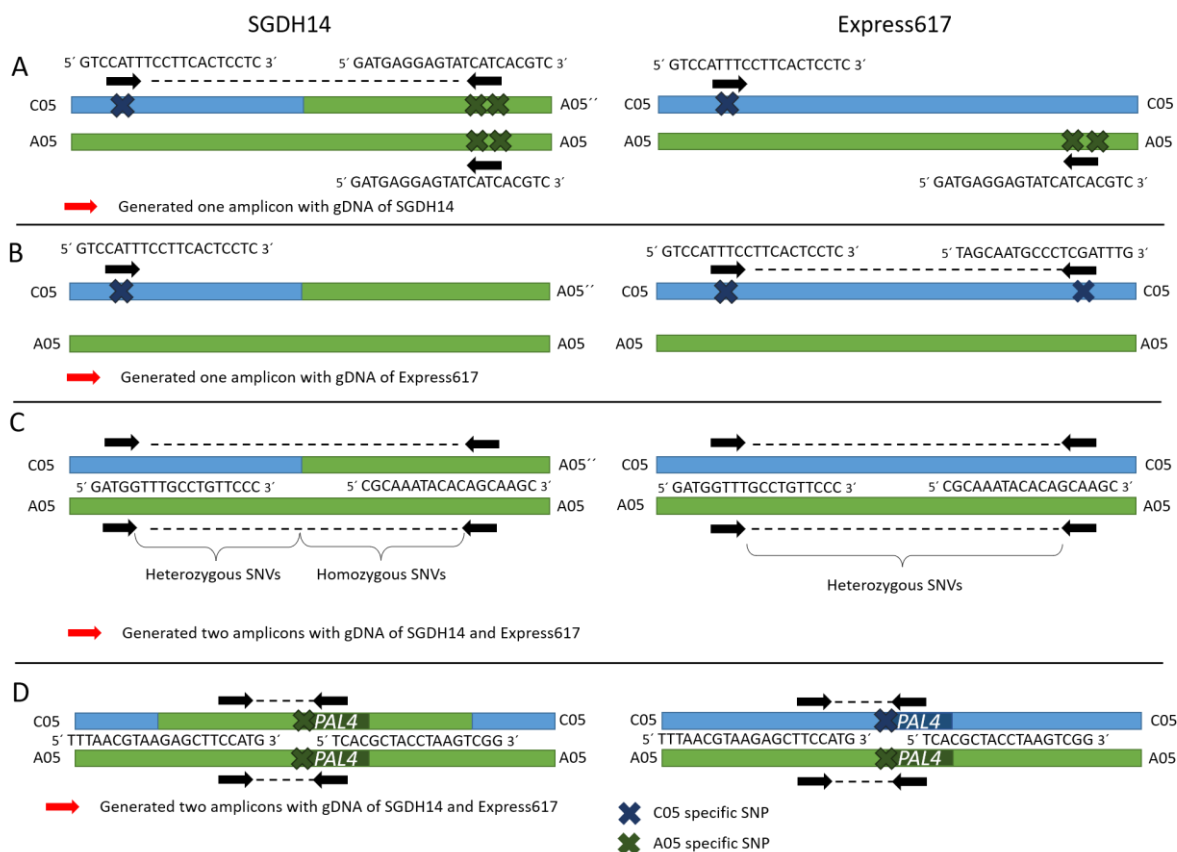

### Supplementary Figure 1: Oligonucleotide design strategies for validation of the HNRT border sequences.

(A) The subgenome-specific for SGD14, (B) the subgenomes-specific for Express 617 and (C) not subgenome-specific oligonucleotide design strategies used for the validation of the border sequences are shown, (D) subgenome-specific oligonucleotide design to determine if the *PAL4* gene of the A and/or the C chromosome is present. Oligonucleotides are marked as black arrows. Each strategy was applied for the left and right border, respectively.

**Supplementary Table 1: Oligonucleotides used in this study for the three different strategies and for the amplification of *PAL4*.** PCR products were sequenced to confirm the correct gene was amplified. The oligonucleotides written in bold and italics indicate the positions which are different between the subgenome-specific primers on the A and C chromosome.

| Strategy         | Oligonucleotide name | Strand  | Sequence (5' to 3')                                   | Annealing Temp. [°C] |
|------------------|----------------------|---------|-------------------------------------------------------|----------------------|
| A – left border  | SGDH14_spec_fw_L     | forward | GTCC <b><i>C</i></b> ATTTCCCTTCACTCCTC                | 60                   |
| A – left border  | SGDH14_spec_rev_L    | reverse | GATGAGGAGTATC <b><i>A</i></b> TACAGTC                 |                      |
| A – right border | SGDH14_spec_fw_R     | forward | TCAGAC <b><i>G</i></b> GC <b><i>A</i></b> GCGTTTAC    | 60                   |
| A – right border | SGDH14_spec_rev_R    | reverse | TTGCCACCACCACC <b><i>T</i></b> AC                     |                      |
| B – left border  | Exp_spec_fw_L        | forward | GTCC <b><i>C</i></b> ATTTCCCTTCACTCCTC                | 60                   |
| B – left border  | Exp_spec_rev_L       | reverse | TAGCAATGCCCTC <b><i>G</i></b> AT <b><i>T</i></b> TG   |                      |
| B – right border | Exp_spec_fw_R        | forward | TGGTCAGATG <b><i>G</i></b> C <b><i>T</i></b> CCGTTTAC | 60                   |
| B – right border | Exp_spec_rev_R       | reverse | TTGCCACCACCACC <b><i>T</i></b> AC                     |                      |
| C – left border  | Not_spec_fw_L        | forward | GATGGTTTGCCTGTTCCC                                    | 56                   |
| C – left border  | Not_spec_rev_L       | reverse | TCGCTGAATAGTCGCAAG                                    |                      |
| C – right border | Not_spec_fw_R        | forward | AACCAAATCCGTTGATGC                                    | 56                   |
| C – right border | Not_spec_rev_R       | reverse | TTGCGTGACTGCTCCAAG                                    |                      |
| D – PAL4         | PAL_nspec_fw_1       | forward | TTTAACGTAAGAGCTTCCATG                                 | 55                   |
| D – PAL4         | PAL_nspec_rev_2      | reverse | TCACGCTACCTAAGTCGG                                    |                      |

**Supplementary Table 2: PCR program for the different subgenomes-specific strategies (A, B) and not subgenome-specific strategy (C), as well as for the amplification of the *PAL4* gene (D).**

| Steps                                  | Temp. [°C]                     | Time [sec] | No. of Cycles |
|----------------------------------------|--------------------------------|------------|---------------|
| PCR program for strategy A and C; PAL4 |                                |            |               |
| initial denaturation                   | 95                             | 60         | 1x            |
| denaturation                           | 95                             | 15         | 35x           |
| annealing                              | 54, 56, 58, 60                 | 15         |               |
| elongation                             | 72                             | 30         |               |
| final elongation                       | 72                             | 180        | 1x            |
| hold                                   | 8                              | infinite   |               |
| PCR program for strategy B             |                                |            |               |
| Steps                                  | Temp. [°C]                     | Time [sec] | No. of Cycles |
| initial denaturation                   | 95                             | 180        | 1x            |
| denaturation                           | 95                             | 30         | 15x           |
| annealing                              | 70 _ 0.7°C decrease each cycle | 45         |               |
| elongation                             | 72                             | 45         |               |
| denaturation                           | 95                             | 30         | 25x           |
| annealing                              | 60 or 61                       | 45         |               |
| elongation                             | 72                             | 45         |               |
| elongate                               | 72                             | 300        | 1x            |
| halt reaction                          | 4                              | 300        | 1x            |
| hold                                   | 20                             | infinite   | 1x            |
