# Supplementary material for: Homoeologous non-reciprocal translocation explains a major QTL for seed lignin content in oilseed rape (Brassica napus L.)
Source: PubMed Central journal article supplement (PMC10345078; doi:10.1007/s00122-023-04407-w), 2023-07-13
Supplement: 122_2023_4407_MOESM4_ESM.pdf [file 122_2023_4407_MOESM4_ESM.pdf]

## **Homoeologous non-reciprocal translocation explains a major QTL for seed lignin content in oilseed rape (*Brassica napus* L.)**

Hanna Marie Schilbert<sup>1,2,†</sup>, Karin Holzenkamp<sup>3,†</sup>, Prisca Viehöver<sup>1</sup>, Daniela Holtgräwe<sup>1</sup>, Christian Möllers<sup>3</sup>

<sup>1</sup> Genetics and Genomics of Plants, CeBiTec and Faculty of Biology, Bielefeld University, Bielefeld, Germany

<sup>2</sup> Graduate School DILS, Bielefeld Institute for Bioinformatics Infrastructure (BIBI), Faculty of Technology, Bielefeld University, Germany

<sup>3</sup> Department of Crop Sciences, Division of Crop Plant Genetics, Georg-August-University, Göttingen, Germany

† These authors contributed equally to this work.

Corresponding author: Hanna Marie Schilbert; [hschilbe@cebitec.uni-bielefeld.de](mailto:hschilbe@cebitec.uni-bielefeld.de)

**Theoretical and Applied Genetics**

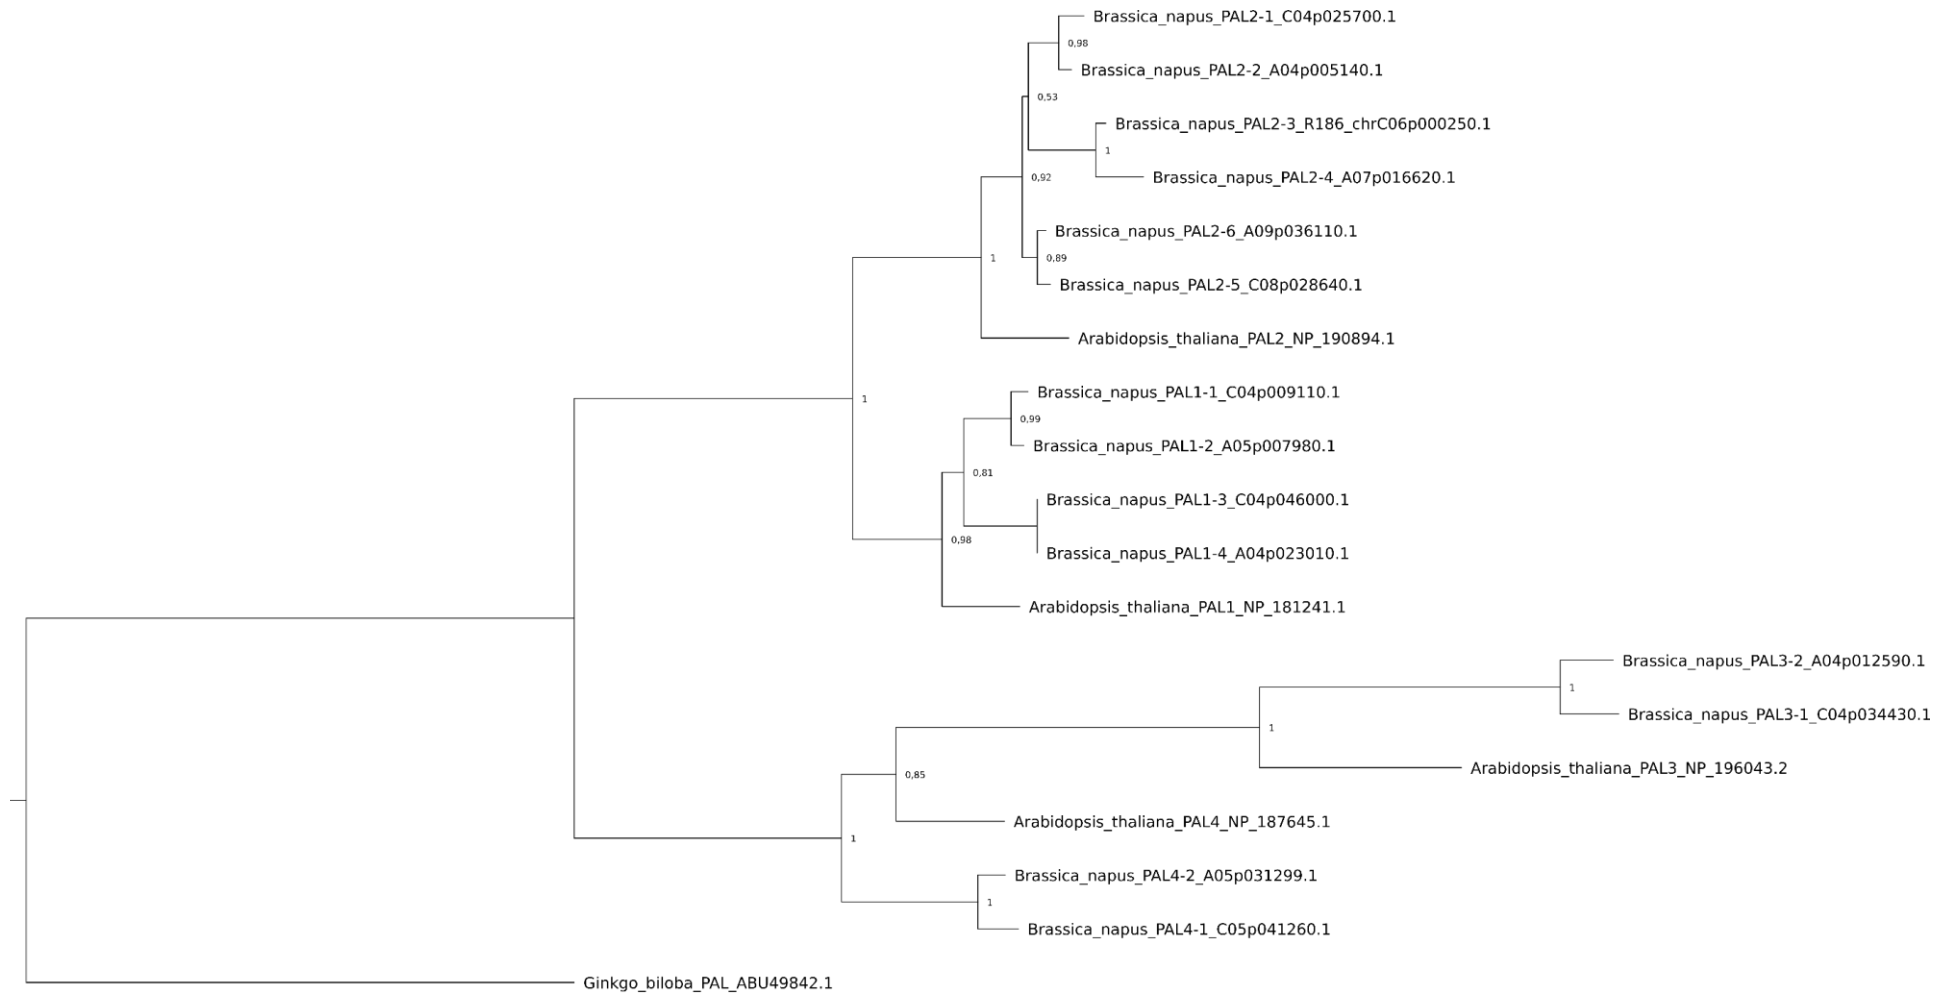

**Supplementary Figure 4: Phylogeny of PAL candidates of *B. napus* Express 617 and previously described PAL sequences.** The maximum-likelihood tree was constructed with FastTree using 10,000 bootstraps and relative bootstrap-values are shown next to relevant nodes. The phylogenetic tree is based on amino acid sequences. The *Ginkgo biloba* PAL sequence was used to root the tree. The GenBank ID of the respective sequence or the Express 617 gene ID is given for each sequence.

**Supplementary Table 6: Amino acid and coding sequences of *B. napus* Express 617 PALs.**

>BnaPAL1-4\_A04p023010.1  
MEVNLGSHGGEVDAMLCGGEIKKNATVVGADPLNWGAAAEQMKGSHLDEVKRMVKEFRPVPVNLGGETLTIGQVAAI STLGNVVKVELSETARAGVKASSDWVWESMGKGTDSYGVTTGFGATSHRRTKN  
GVALQKELIRFLNAGIFGSKETSHTLPHSATRAAMLVRINTLLQGYSGIRFEILEAITSFLNINNITPSLPLRGITITASGDLVPLSYIAGLLTGRPNKATGPNGEALNAEEAFKMAGVTSGFDDLQPKLEGLALVNGT  
AVGSGMAMVLFANVLSVLAEVL SAVFAEVMMSGKPEFTDHLTHRLKHHHPGQIEAAAIM EHI LDGSSYMKLAQKLHEMDPLQPKQDRYALRTSPQWLGPQIEVIRYATKSIEREINSVNDNPLIDVSRNKAIHG  
GNFQGTPIGVSMNDNRLAIAAIGKLMFAQFSELVNDYNNGLPSNLTASRNPSLDYGFKGA EIAMASYCSELQYLANPVTSHVQSAEQHNQDVNSLGLISSRKTSEAVDILKLMSTTFLVIGICQAI DLRHLEENLK  
QTVKNTVSQVAKKVLTTGVNGELHPSRFCEKDLLKVVDR EQVYTYADDP SATYPLIQKLRQVIVDHALVNGESEKNAMTSIFHKIGAFEEELKAVLPKEVEAARAAYDNGTAAIPNRIKECRSYPLRYFVREEL  
GTELLTGEKATSPGEEFDKVF TAICEGKIIDPLMECLDEWNGAPIPIC\*

>BnaPAL1-4\_A04p023010.1\_BnaEXP  
ATGGAGGTTAACGGATTATCACACGGAGGAGAAGTCGACGCTATGTTATGCGGGCGGAGAGATCAAGAAGAATGCCACGGTGGTTGGGGCTGATCCTCTCAACTGGGGAGCTGCAGCGGAGCAAATG  
AAAGGGAGCCATTTGGATGAGGTGAAGAGAATGGTGAAGGAGTTTAGGAGGCCAGTGGTGAATCTCGGAGGCGAGACTCTCACGATCGGACAAGTGGCAGCAATCTCGACCCCTGGAAACGGTGTG  
AAGGTGGAGTTGTCGGAGACGGCGGAGAGCCGGTGTGAAAGCGAGTAGTGATTGGGTGATGGAGAGTATGGGCAAAGGAACCGATAGTTATGGTGTACTACTGGTTTTGGTGCTACTTCTCACC  
GAACCAAGAACGGTGTGCTCTTCAGAAAAGAGCTTATAAGATTTCTGAACGCCGGAATATTCGGCAGCACGAAGGAAACATCCCACACATTACCACACTCCGCCACAAGAGCCGATGCTCGTACGC  
ATCAACACTCTCCTCCAAGGCTACTCAGGCATACGTTTTCGAGATCCTCGAGGCCATAACAAGTTTCTCAACAACAACATCACTCCTTCACTCCCTCTCCGCGGCACCATCACCGCTCCGGAGACCT  
CGTCCCCCTCTCCTACATCGCCGACTCTTAACCGGACGTCCCAACTCCAAGCCACCGGTCCCAACGGCGAAGCCTTGAACGCAGAGGAAGCCTTCAAATGGCAGGAGTCACCTCCGGCTTCTTC  
GACCTCCAGCCTAAAGAAGGCCTCGCCCTAGTCAACGGCACGGCCGTTGGCTCCGGCATGGCGTGCATGGTTCTCTTGAAGCCAACGTCCTCTCGGTCTGGCCGAGGTTTTATCAGCCGTCTTC  
GCCGAGGTGATGAGCGGGAAGCCGGAGTTCACCGATCATTGACTCACCGGCTGAAGCACCACCCCGGGCAGATAGAAGCCGCGGTATAATGGAACACATTCTCGACGGGAGCTCGTACATGAAG  
CTAGCTCAGAAGCTTACGAGATGGATCCGTTACAAAAACCCAAACAAGACCGTTACGCTCTACGTACCTCTCCCAATGGCTAGGTCTCAGATAGAAGTATCCGTTACGCGACCAAGTCCATCGA  
GCGTGAGATAAACTCCGTCAACGACAACCCCTTTGATCGATGTCTCGAGAAACAAAGCCATTACGGTGGTAACTTCCAGGGAACACCCATCGGTGTGTCTATGGACAACACACGTTTAGCTATCGCGG  
CCATAGGGAAGCTCATGTTCCGCTCAGTTCCTCGAGCTGGTCAACGATTATTACAACAACGGTCTTCTTTCGAACCTAACCGCTTCGAGGAACCCTAGTTTGGACTACGGTTTCAAAGGAGCGGAGATC  
CGCATGGCTTCGACTGTTCAAGCTTCACTTGGCCAACCCCGTGACTAGCCATGTTCAATCAGCAGAGCAACACAACCAAGACGTGAACCTTTAGGACTAATCTCATCTCGCAAGACATCAGAA  
GCTGTAGACATACTAAACTCATGTGCAGCAACGTTCCCTTGTCCGAAATCGCCAAGCCATCGATCTAAGACACTTGGAGGAGAATCTAAAACAACGGTCAAGAACACAGTCTCTCAAGTCGCAAGAAA  
GTTCTCACCCTGGAGTCAACGGTGGAGCTTCAACCCATCACGCTTCTGCGAGAAAGACTTACTCAAAGTCGTGACCGTGAGCAAGTCTACACGTACGCGGACGACCCATGCAGCGCCACGTACCCGT  
TGATCCAGAAGCTGAGGCAAGTCAATCGTTGACCATGCTTTGGTCAACGGTGGAGAGCGAGAAGAATGCAATGACTTCGATCTTCCATAAGATTGGAGCCTTCGAGGAGGAGCTCAAGCGCGTGTACC  
TAAAGAAGTGGAGGCAGCTAGAGCGGCGTATGATAACGGAACAGCTGCGATACCGAACAGGATCAAGGAGTGTAGGTGATCCTTTGTATAGTTTTGTGAGGGAGGAGCTTGAACAGAGCTTTTG  
ACCGGAGAGAAAGCGACGTCGCCCGGAGAAGAGTTTGATAAGGTTTTCACGGCGATTTGTGAAGGGAAGATTATTGATCCGTTGATGGAGTGTCTCGATGAGTGGAACGGAGCTCCCATTCCTATAT  
GTTAA

>BnaPAL1-3\_C04p046000.1  
MEVNLGSHGGEVDAMLCGGEIKKNATVVGADPLNWGAAAEQMKGSHLDEVKRMVKEFRPVPVNLGGETLTIGQVAAI STLGNVVKVELSETARAGVKASSDWVWESMGKGTDSYGVTTGFGATSHRRTKN  
GVALQKELIRFLNAGIFGSKETSHTLPHSATRAAMLVRINTLLQGYSGIRFEILEAITSFLNINNITPSLPLRGITITASGDLVPLSYIAGLLTGRPNKATGPNGEALNAEEAFKMAGVTSGFDDLQPKLEGLALVNGT  
AVGSGMAMVLFANVLSVLAEVL SAVFAEVMMSGKPEFTDHLTHRLKHHHPGQIEAAAIM EHI LDGSSYMKLAQKLHEMDPLQPKQDRYALRTSPQWLGPQIEVIRYATKSIEREINSVNDNPLIDVSRNKAIHG  
GNFQGTPIGVSMNDNRLAIAAIGKLMFAQFSELVNDYNNGLPSNLTASRNPSLDYGFKGA EIAMASYCSELQYLANPVTSHVQSAEQHNQDVNSLGLISSRKTSEAVDILKLMSTTFLVIGICQAI DLRHLEENLK  
QTVKNTVSQVAKKVLTTGVNGELHPSRFCEKDLLKVVDR EQVYTYADDP SATYPLIQKLRQVIVDHALVNGESEKNAMTSIFHKIGAFEEELKAVLPKEVEAARAAYDNGTAAIPNRIKECRSYPLRYFVREEL  
GTELLTGEKATSPGEEFDKVF TAICEGKIIDPLMECLDEWNGAPIPIC\*

>BnaPAL1-3\_C04p046000.1\_BnaEXP  
ATGGAGGTTAACGGATTATCACACGGAGGAGAAGTCGACGCTATGTTATGCGGGCGGAGAGATCAAGAAGAATGCCACGGTGGTTGGGGCTGATCCTCTCAACTGGGGAGCTGCAGCGGAGCAAATG  
AAAGGGAGCCATTTGGATGAGGTGAAGAGAATGGTGAAGGAGTTTAGGAGGCCAGTGGTGAATCTCGGAGGCGAGACTCTCACGATCGGACAAGTGGCAGCAATCTCGACCCCTGGAAACGGTGTG  
AAGGTGGAGTTGTCGGAGACGGCGGAGAGCCGGTGTGAAAGCGAGTAGTGATTGGGTGATGGAGAGTATGGGCAAAGGAACCGATAGTTATGGTGTACTACTGGTTTTGGTGCTACTTCTCACC  
GAACCAAGAACGGTGTGCTCTTCAGAAAAGAGCTTATAAGATTTCTGAACGCCGGAATATTCGGCAGCACGAAGGAAACATCCCACACATTACCACACTCCGCCACAAGAGCCGATGCTCGTACGT  
ATCAACACTCTCCTCCAAGGATACTCCGGCATAAGTTTTCGAGATCCTCGAGGCCATAACAAGTTTCTCAACAACAACATCACTCCTTCCCTCCCTCTCCGCGGCACCATCACCGCTCCGGAGACCT  
CGTCCCCCTCTCCTACATCGCCGACTCTTAACCGGACGTCCCAACTCCAAGCTACCGGTCCCAACGGCGAAGCCCTAAACGCAGAGGAAGCCTTCAAATGGCTGGAGTCACCTCAGGCTTCTTT  
GACCTCCAGCCTAAGGAAGGCCTCGCCCTAGTCAACGGCACGGCCGTTGGCTCCGGCATGGCGTGCATGGTTCTCTTGAAGCCGACGTCCTCTCGGTCTGGCCGAGGTTTTATCAGCCGTCTTC  
GCCGAGGTGATGAGCGGGAAGCCGGAGTTCACCGATCATTGACTCACCGGCTGAAGCACCACCCCGGGCAGATAGAAGCCGAGCTATAATGGAACACATTCTCGACGGGAGCTCGTACATGAAG  
CTAGCTCAGAAGCTTACGAGATGGATCCGTTACAAAAACCCAAACAAGACCGTTACGCTCTACGTACCTCTCCCAATGGCTAGGTCTCAGATAGAAGTATCCGTTACGCGACCAAGTCCATCGA  
GCGTGAGATAAACTCCGTCAACGACAACCCCTTTGATCGATGTCTCGAGAAACAAAGCCATTACGGTGGTAACTTCCAGGGAACACCCATCGGTGTGTCTATGGACAACACACGTTTAGCTATCGCGG  
CCATAGGGAAGCTCATGTTCCGCTCAGTTCCTCGAGCTGGTCAACGATTATTACAACAACGGTCTTCTTTCGAACCTAACCGCTTCGAGGAACCCTAGTTTGGACTACGGTTTCAAAGGAGCGGAGATC

GCGATGGCTTCGACTGTTCCAGAGCTTCAGTACTTGGCCAACCCAGTGACTAGCCATGTTCAATCAGCTGAGCAACACAACCAAGACGTGAACTCTTTAGGACTAATCTCGTCTCGCAAGACATCAGAA  
GCTGTAGACATACTCAAACCTCATGTCTACAACGTTCCCTTGTCGGAATCTGCCAAGCCATCGATCTAAGACTTGGAGGAGAATCTAAAACAAACCGGTCAAGAACACAGTCTCTCAAGTCGCCAA  
GTTCTCACCACTGGAGTCAACGGTGAGCTTACCCATCACGCTTCTGCGAGAAAGACTTACTCAAAGTCTGACCGGTGAGCAAGTCTACACGTACGCGGACGACCCATGCAGCGCCACGTACCCGT  
TGATCCAGAAGCTGAGGCAAGTCACTCGTTGACCATGCTTTGGTCAACGGTGAGAGCGAGAAGAATGCAATGACTTCGATCTTCCATAAGATTGGAGCCTTCGAGGAGGAGCTCAAGCGCGTGTCC  
GAAAGAAGTGGAGGACAGCTAGAGCGGCGTATGATAACGGAACAGCTGCGATACCGAACAGGATCAAGGAGTGTAGGTCGTATCCTTTGATAGGTTTGTGAGGGAGGAGCTTGGAACAGAGCTTTTG  
ACCGGAGAGAAAGCGACGTCGCCCGGAGAAGAGTTTGATAAGGTTTTACGGCGATCTGTGAAGGGAAGATTATTGATCCGTTGATGGAGTGTCTCGATGAGTGAACGGAGCTCCCATTCCTATAT  
GTTAA

>BnaPAL1-2\_A05p007980.1  
MEINGSSHKVDAMLCGAEIKNVTVAAADPLNWGAAAEQMKGSHLDEVKRMVMEFRKPVVNLGGETLTIGQVAAISTVGNVGVKVELSETARAGVKASSDWMESMGKGTDSYGVTTGFGATSHRRTKNGVAL  
QKELIRFLNAGIFGSTKETCHTLPHSATRAAMLVRINTLLQGYSGIRFEILEAITSFLNTNITPSLPLRGITASGDLVPLSYIAGLLTGRPNKATGPNGEALNAEEAFKKAGIPSGFFDLQPKEGLALVNGTAVGSG  
MASMVLFE TNVLSVLAEVLSAVFAEVMMSGKPEFTDHLTHRLKHHPGQIEAAAIMEHILDGSSYMKLAKLHELDPLQKPKQDRYLRTSPQWLGPQIEVIRYATKSIEREINSVNDNPLIDVSRNKAIHGGNFQGT  
PIGVSM DNTRLAIASIGKLMFAQFSELVNDFYNNGLPSNLTASRNPSLDYGFKGAEIAMASYCSELQYLANPVTHVQSAEQHNQDVNSLGLISSRKTAEAVDILKLMSTTFLVAICQAVDLRHLEENLQTVKNT  
VSQVAKKVLTTGVNDELHPSRFCEKDLLKVV DREQVYTYADDDPCSATYPLIQKLRQVIVDHALVNGESEKNAMTSIFHKIGAFEEELKAVLPDEVEAARVAYDNGTSAIPNRIKECRSYPLRYFVREELGTELLG  
EKVTS PGEEFDKVFTAICEGKIIDPLMECLSEWNGAIPIC\*

>BnaPAL1-2\_A05p007980.1\_BnaEXP  
ATGGAGTTAACGGATCATCACAAAGTCGACGCTATGTTATGCGGCGCAGAGATCAAGAATGTCACGGTGGCTGCGGCGGATCCTCTCAACTGGGGGGCTGCGGCGGAGCAAATGAAAGGGAGC  
CATTTGGATGAAGTGAAGAGAATGTTATGGAGTTTAGGAAGCCTGTGGTGAATCTCGGAGGAGAGACTCTGACGATCGGACAAGTAGCAGCGATCTCGACCGTTGGAATGGTGTGAAGGTGGAGC  
TGTCGGAGACGCGCAAGAGCCGGTGTGAAGCGGAGCAGTGATTGGGTGATGGAGAGTATGGGCAAAGGCACTGATAGTTATGGTGTACTACTGGTTTTGGTGTACTTCTCATCGTAGAACAAAA  
TGGCGTCGCACTTCAGAAGGAGCTTATAAGATTCTGAACGCCGGAATATTCCGGCAGCAGCAAAGAAACATGCCACACACTACCACACTCCGCCACGAGAGCCGCCATGCTCGTACGCATCAACT  
CTCCTCCAAGGATACCCGATCCGCTTCGAGATCCTCGAGGCCATAACCAGCTTCTCAACACCAACATCACTCCTTCCCTCCCTCTCCGCGGCACCATCACCGCCTCCGGAGACCTCGTCCCC  
TCTCCTACATCGCCGGCTCCTCACCGGCCCTCCAACTCCAAAGCCACCGGTCCCAACGGCGAAGCCTTGAACGAGAGGAAGCCTCAAGAAGGCTGGAATCCCTCCGATTCCTTGGACTTGCA  
GCCAAGGAAGGTCTCGCCCTAGTCAACGGCACAGCCGTTGGCTCCGGCATGGCCTCGATGGTGTCTTTCGAGACGAACGTCTCTCGGTCTGCGCGAGGTTCTCTCAGCTGTCTTCGCCGAGG  
T  
GATGAGCGGAAAGCCGGAGTTCACCGACCATTTAACCCACAGGCTTAAACACACCCCGGCCAGATCGAAGCCGCGGCGATAATGGAGCACATCCTTGACGGGAGCTCGTACATGAAGCTAGCTAA  
GAAGCTACAGCAGTTGATCCGTTACAGAAACCTAAACAAGACCGTTACCGCGCTCCGACGTCACCTCAATGGCTAGGTCCTCAGATAGAAGTGTCCGTTACGCAACAAGTCCATCGAACGTGAGA  
TCAACTCCGTCACAGCAACCCCTTGTATCGAGCTTTTCGAGAACTTACAGCACTTCCAGGAGTAACTTCCAGGAAACCCGATAGGTTCTCCATGGACAACACGCGTCTCGTATAGCATGATAGG  
GAAGCTCATGTTGCTCAGTTCTCTGAGCTCGTCAACGACTTCTACAACAACGGTCTTCTTCTAACCTAACCGCCTCGAGGAACCCTAGTTTGGACTACGGTTTCAAAGGAGCGGAGATCGCTATGG  
CATCCTACTGTTCCGAGCTTCACTTACGCAATCCAGTTACAACCCATGTTCAATCCGCGGAGCAACACAACCAAGACGTGAACTCTTTAGGACTAATCTCGTCTCGCAAGACGGCAGAAGCTGTTG  
ACATCTCAAACCTATGTCGACGACGTTCCCTTGTGCGAATCTGCCAAGCTGTAGATCTAAGACACTTGGAGGAGAATCTAAAACAAACCGTGAAGAACACGGTCTCTCAAGTGGCTAAGAAAGTTCTAA  
CCACTGGAGTCAACGGTGAAGCTTACCCATCTCGTCTTCTGCGAGAAAGATTTACTCAAAGTCTGTTGACCGTGAACAAGTCTACAGTACGCGGACGATCCATGCAGCGCTACGTACCCGTTGATCAG  
AAGCTAAGGCAAGTTATCGTTGACCATGCTTTGGTCAACGGTGAGAGTGAGAAGAACGCTATGACTTCGATCTTCCACAAGATTGGTGCTTTGACGAGGAGGAGCTCAAGGCCGTTGCTTCTGATGAAGT  
GGAGGCAGCTAGAGTGGCGTACGATAACGGGACATCTGCTATACCGAACCGGATCAAGGAGTGTAGGTCGTATCCTTTGATAGGTTCTGAGGGGAGGAGCTTGGAACTGAGCTTTTGACCGGAGAG  
AAAGTACGTCGCCGGGAGAAGAGTTTGATAAGGTTTTACGGCGATATGTGAAGGGAAGATCATTGATCCGTTGATGGAGTGTCTCAGTGAAGTGAACGGAGCTCCCATTCATCTGCTAA

>BnaPAL1-1\_C04p009110.1  
MEINGSSYKVDAMLCGGETKNVTVAAADPLNWGAAADQMKGSHLDEVKRMVMEFRKPVVNLGGETLTIGQVAAISTVGNVGVKVELSETARAGVKASSDWMESMGKGTDSYGVTTGFGATSHRRTKNGVA  
LQKELIRFLNAGIFGSTKETCHTLPHSATRAAMLVRINTLLQGYSGIRFEILEAITSFLNTNITPSLPLRGITASGDLVPLSYIAGLLTGRPNKATGPNGEALNAEEAFKKAGIPSGFFDLQPKEGLALVNGTAVGS  
GMASMVLFE TNVLSVLAEVLSAVFAEVMMSGKPEFTDHLTHRLKHHPGQIEAAAIMEHILDGSSYMKLAQKLHEMDPLQKPKQDRYLRTSPQWLGPQIEVIRYATKSIEREINSVNDNPLIDVSRNKAIHGGNFQ  
GTPIGVSM DNTRLAIASIGKLMFAQFSELVNDFYNNGLPSNLTASRNPSLDYGFKGAEIAMASYCSELQYLANPVTHVQSAEQHNQDVNSLGLISSRKTAEAVDILKLMSTTFLVAICQAVDLRHLEENLQTVK  
NTVSQVAKKVLTTGDNDELHPSRFCEKDLLKVV DREQVYTYADDDPCSATYPLIQKLRQVIVDHALVNGESEKNAMTSIFHKIGAFEEELKAVLPDEVEAARVAYDNGTSAIPNRIKECRSYPLRYFVREELGTELL  
TGEKVTSPGEEFDKVFTAICEGKIIDPLMECLSEWNGAIPIC\*

>BnaPAL1-1\_C04p009110.1\_BnaEXP  
ATGGAGTTAACGGATCATCATACAAAGTCGACGCTATGTTATGCGGCGGAGAGACCAAGAATGTCACGGTGGCTGCGGCGGATCCTCTGAACTGGGGAGCTGCGGCGGATCAAATGAAAGGGAGC  
CATTTGGATGAAGTGAAGAGAATGTTATGGAGTTTAGGAAGCCTGTGGTGAATCTCGGAGGAGACTCTGACGATCGGACAAGTAGCAGCGATCTCGACCGTTGGAATGGTGTGAAGGTGGAGC  
TGTCGGAGACGCGCAAGAGCCGGTGTGAAGCGGAGCAGTGTATTGGGTGATGGAGAGTATGGGCAAAGGCACTGATAGTTATGGTGTACTACTGGTTTTGGTGTACTTCTCATCGTAGAACCAAAAA  
TGGCGTCGCACTTCAGAAGGAGCTTATAAGATTCCTGAACGCCGGAATATTCCGGCAGCAGCAAAGAAACATGCCACACACTGCCACACTCCGCCACAAGAGCTGCCATGCTCGTACGCATAAACA  
CTCCTCCAAGGATACTCCGGCATCCGCTTCGAGATCCTCGAGGCCATAACCAGCTTCTCAACACCAACATCACTCCTTCCCTCCCTCTCCGCGGCACCATCACCGCCTCCGGAGACCTCGTCCCCC  
TCTCCTACATCGCCGGCCTCTCACCGGCCGTCCTCAACTCCAAAGCCACCGGTCCTCAACGCGAGAGGAAGCCTTGAACGAGAGGAAGCCTTCAAGAAGGCCGGAATCCCTCTGGATTCCTTGGACTTGA

GCCCAAGGAAGGTCTCGCCCTAGTCAACGGCACAGCCGTTGGCTCCGGCATGGCCTCGATGGTTCTCTTCGAGACAAACGTCTGTGCGTTCTGGCCGAGGTTCTCTCAGCTGTCTTCGCCGAGGT  
GATGAGCGGCAAGCCGGAGTTCACCGACATTTAACCCACAGGCTGAAGCACACCACCCCGGCCAGATCGAAGCCCGCGGCATATGAGGACACATCTCGACGGGAGCTCGTACATGAAGCTAGTCTA  
GAAGCTACAGGATGGATCCGTTACAGAAACCTAAACAAGACCGTTACGCGCTCCGCACATCACTCAATGGCTAGGTCCTCAGATAGAAGTGATCCGTTACGCCACCAAGTCCATCGAGCTGAG  
ATAAACTCCGTCACGACAACCCCTTTGATCGACGTTTCAAGAAAACAAGCGATTACGCGAGGTAACCTCCAGGGGACACCCATCGGTGTCTCCATGGACAACACGCGTCTCGCTATAGCATCGATAGG  
GAAGCTCATGTTCCGCTCAGTTCCTCCGAGCTTGTAAACGACTTCTACAACAACGGTCTTCTTCTAACCTAACCGCTTCGAGGAACCCTAGTTTGGACTACGGTTTCAAAGGAGCGGAGATCGCTATGGC  
TTCCTACTGTTCCAGAGCTTACAGTACTTGGCCAATCCAGTTACAACCCATGTTACAGTCAGCAGAGCAACACAACCAAGACGTGAACCTTTAGGACTAATCTCATCACGCAAGACGGCAGAAGCTGTCGA  
CATACTCAAACCTCATGTCGACAACGTTCTCGTCGCAATCTGCCAAGCTGTGGATCTAAGACACTTGGAGGAGAATCTAAAACAACCCGTGAAGAACACTGTCTCTCAAGTGGCCAAGAAAGTTCTAAC  
CACTGGGAGACAACGGTGAGCTTACCCATCTCGCTTCTGCGAGAAAGATTTACTCAAAGTCGTTGACCGTGAACAAGTCTACACGTACGCGGACGATCCATGCAGCGCCACGTACCCGTTGATCCAG  
AAGCTAAGGCAAGTTATCGTTGACCATGCTTTGGTCAACGGTGAGAGCGAGAAGAACGCTATGACTTCGATCTTCCACAAGATTGGTGCTTTTCGAGGAGGAGCTCAAGGCGGTGCTTCTCGACGAAGT  
GGAGGCAGCTCGAGTGGCGTATGATAACGGGACATCTGCTATACCGAACC GGATCAAGGAGTGTAGGTCGATCCCTTTGTATAGGTTCTGTGAGGGAGGAGCTTGAAGTGAAGTCTTTGACCGGAGAG  
AAGGTGACGTCGCCGGGAGAAGAGTTTGATAAGGTTTACGGCGATATGTGAAGGGAAGATCATTGATCCGTTGATGGAGTGTCTCAGTGAGTGAACGGAGCTCCCATTCCAATATGCTAA

>BnaPAL2-2\_A04p005140.1

MDQINGSVHQNGKTEAMLLCGGLEKTKVTVAADPLNWGAAAAEQMKGSHLDEVKRMVEDYRKPVVNLGGETLTIGQVAAISNVGGGVKVELAEASRAGVKASSDWMESMGKGTDSYGVTTGFGATSHRRT  
KNGTALQTELIRFLNAGIFGNTKETCHTLPESTRAAMLVRVNTLLQGYSGIRFEILEAITSLLNHNISPSPPLRGTITASGDLVPLSYIAGLLTGRPNKATGPNGESLTAEEAFKAGITSGFFDLQPK EGLALVNG  
TAVGSGMASMVLFEANVQSVLAEVLSAIFAEVMSGKPEFTDHLTHRLKHPGQIEAAAIMEHILDGSSYMKLAQLHEMDPLQKPKQDRYALRTPQWLGPQIEVIRHATKSIEREINSVNDNPLIDVSRNKAIHG  
GNFQGTPIGVSMNDNRLAVAIAIGKLMFAQFSELVNDFYNNGLPSNLTASNPNPLDYGFKAIEAMASYCSELQYLANPVTHVQSAEQHNQDVNSLGLISSRKTSEAVDILKLMSTTFLVAICQAVDLRHLEENL  
RQTVKNTVSVQVAKKVLTTGVNGLHPSRFCEKDLLKVVVDREQVFTYVDDPCSATYPLMQKLRQVIVDHALSNGETEKNAVTSIFQKIGAFEEELKMVLPKEVDATREAYGNGTAAIPNRIKECRSYPLYKFVREE  
LGTKLLTGEKVVSPGEEFDKVFAMCEGKIIDPLMDCLKEWNGAPIIC\*

>BnaPAL2-2\_A04p005140.1\_BnaEXP

ATGGATCAGATCAACGGATCAGTTCCACAAAACGGCAAAACCGAAGCCATGTTGTTGTGCGGCGGACTAGAGAAGACTAAAGTGACGGTGGCGGCGGATCCGTTGAATTGGGGTGTGCGGCGGAG  
CAGATGAAAGGGAGTCAATTTGGATGAGGTGAAGAGGATTGGTTGAGGATTACCGTAAACCGGTGGTGAATCTCGGCGGAGAAACACTGACGATCGGACAAGTCGCTGCGATCTCGAACGTAGGCGGT  
GGCGTTAAGGTTGAGCTAGCGGAGGCTTCAAGAGCCGGCGTGAAGCTAGCAGCGATTGGGTGATGGAGAGTATGGGTAAGGTAAGTACTGACAGTTACGGTGAACCAACCGGTTTGGAGCTACCTCT  
CACCGGAGAACAAAAACGGCACCGCTTTGCAAACCGAACTCATCAGGTTTTTGAACGCGGGAATATTCGGGAACACGAAGGAGACATGCCACACGCTACCGGAATCCGCCACGAGAGCCGCCATG  
CTCGTCCGAGTCAACACACTCTCCAAGGATACCTCGGATCCGATTCGAAATCCTCGAAGCGATCACCAGCCTCTCAACCACAACATCTCTCCGCTCTCTCCCCCTCCGTGGAACCATAACCGCCTC  
CGCGACTCTGTCCTCCTACATCGCCGCTCCTCACCGGCGTCCAAACTCCAAAGCCACCGGTCCCAAACCGGCGAATCCCTAACCAGGAGGAGCCTTCAAGAAAGCGGGAATCACTTC  
CGGATCTTTCGATCTACAGCCTAAGGAAGGCTTAGCGCTCGTCAACGGCACGGCGGTTGGATCCGGCATGGCGTCGATGGTTCTCTTGAAGCGAATGTTCAATCGGTCTCGCCGAGGTTTTATCC  
GCGATCTTCCGCGGAGGTGATGAGCGGGAAGCCGAGTTCACCGATCATTGACTCACCGACTCAAACACCACCCCGGACAAATCGAGGCGGCGGCGATCATGGAGCACATCTCGACGGAAGCTCG  
TACATGAAGCTAGCGGCAAAGCTCCACGAGATGGATCCGTTACAAAAACCGAAACAAGACCGTTACGCGCTCCGCACGCTCTCTCAGTGGCTAGGCCCTCAGATCGAAGTGTATCCGTCACGCCACGA  
AGTCAATCGAGCGTGAGATCAACTCCGTTAATGATAATCCGTTAATCGACGTTTTCGAGGAACAAGCGATTACCGGTGGTAACTTCCAGGGGACTCCGATAGGAGTCTCTATGGACAACACAGTTTA  
GCGGTTGCAGCTATTGGGAAGCTCATGTTCCGCTCAGTTCTCGGAGCTTGTAAACGACTTCTACAACAACGGTCTTCTTCCGAATCTAACCGGTTCCAAACAACCCAAAGCTTGGATTACGGATTCAAAGGA  
GCGGAGATCGCTATGGCTTCTACTGCTCTGAGCTTACGTACCTTGCGAATCCGGTTACAACCCATGTTCAATCAGCTGAGCAGCATAACCAAGATGTTAACTCTTTAGGACTCATCTCGTCTCGTAAG  
ACGTCAGAAGCTGTTGACATCTCAAGCTCATGCTACAACGTTCTCTGATAGCGATTTGTCGAAGCTGTTGATTTGAGACATCTCGAGGAGAATCTGAGACAGACCGTGAAGAACACCGTTCCTCAAGT  
GCGAAGAAAGTGTGACTACTGGAGTCAACGGGGAGTTGCATCCATCGCGGTTCTGTGAGAAAGACTTGTAAAGTTCGTTGATCGTGAACAAGTGTTCATACGTTGACGATCCTTGTAGCGCTAC  
GTACCCATTGATGCAGAAGCTAAGACAAGTTATCGTTGATCAGCGTTATCCAATGGTGAGACTGAGAAGAACCGCAGTGACTTCGATCTTCAAAGATTGGAGCTTTTGGAGGAGCTTAAAGATGGT  
GCTTCTAAGGAAGTGGATGCGACTAGAGAGGCTTACGGTAATGGAACGGCGGCGATTCCGAACAGGATTAAGGAATGTCGGTCTTATCCATTATATAAGTTTGTGAGGGAAGAGCTCGGGACGAAG  
TTGCTGACCGGAGAAAAGGTTGCTCTCCGGGAGAGGAGTTTGATAAGGTGTTCACTGCAATGTGTGAAGGTAAGATTATTGATCCATTGATGGATTGTCTCAAGGAATGGAACGGAGCTCCCATTCC  
CATATGTTAA

>BnaPAL2-6\_A09p036110.1

MDQINSSVHQNGKIEAMLLCGGVEKTKVAVAADPLNWGAAAAEQMKGSHLDEVKRMVEEYRRPVVNLGGETLTIGQVAAISTVGGGVKVELAEASRAGVKASSDWMESMGKGTDSYGVTTGFGATSHRRTK  
NGTALQTELIRFLNAGIFGNTKETCHTLPESTRAAMLVRVNTLLQGYSGIRFEILEAITSFLNHNISPSPPLRGTITASGDLVPLSYIAGLLTGRPNKATGPNGESLTAEEAFKQAGIASGFFDLQPK EGLALVNG  
TAVGSGMASMVLFEANVQSVLAEVLSAIFAEVMSGKPEFTDHLTHRLKHPGQIEAAAIMEHILDGSSYMKLAQLHEMDPLQKPKQDRYALRTPQWLGPQIEVIRHATKSIEREINSVNDNPLIDVSRNKAIHG  
GNFQGTPIGVSMNDNRLAIAISIGKLMFAQFSELVNDFYNNGLPSNLTASNPNPLDYGFKAIEAMASYCSELQYLANPVTHVQSAEQHNQDVNSLGLISSRKTSEAVDILKLMSTTFLVAICQAVDLRHLEENL  
RQTVKNTVSVQVAKKVLTTGVNGLHPSRFCEKDLLKVVVDREQVFTYVDDPCLATYPLMQKLRQVIVDHALSNGETEKNAVTSIFQKIGAFEEELKMVLPKEVDAAREAYGNGTAAIPNRIKECRSYPLYKFVREE  
LGTKLLTGEKVVSPGEEFDKVFAMCEGKIIDPLMECLKEWNGAPIIC\*

>BnaPAL2-6\_A09p036110.1\_BnaEXP

ATGGATCAGATTAACAGTTCAGTTCACCGAAGCGCAAGATCGAAGCCATGTTGTTGCGGCGGAGTAGAGAAGACGAAGGTGGCTGTGGCGGCGGATCCGTTGAACTGGGGTGCAGCAGCGGAGCA

GATGAAAGGGAGTCACTTGGATGAGGTGAAGAGGATGGTTGAGGAGTATCGTAGACCGGTGGTGAATCTCGGAGGAGAGACGCTAACAACTCGGACAAGTTCGCGGGGATCTCCACCGTAGGCGGAG  
GTGTTAAGGTTGAGCTAGCGGAGGCTTCGAGAGCCGGCGTGAAGCTAGCAGTGAATGGGTTATGGAGATATGGGCAAAGGCTACTGACAGTTACGGTGTACCACCGGGTTGGGGCGACCTCTC  
ACCGGAGAACCAAAACCGCATTGCAAACTCCAGTATCGAGATTTTGAACCGCGGAATTCGGTAAACACGAAAGGAGACATGCCACACGCTACCGGAATCCGCCACGAGCGCCGACATGCT  
CGTCCGAGTCAAACTCTCTCCAAGGATACTCCGGGATCCGATTGAAATCCTCGAAGCGATACCAGCTTCTCAACCACAACATCTCTCCGTCTCTCCCCCTCCGCGGAACCATAACCGCCTCCG  
GCGATCTCGTCCCCCTCTCTACATCGCCGGCCTCTCACCGGCGCTCCGAACCTCAAAGCCACAGGTCCCAACGGCGAATCCCTAACCGCCGAAGAGGCCTCAACAAGCCGGAATCGTTCGG  
GATTCTTCGATCTACAGCCTAAAGAAGGCTTAGCGCTCGTTAACGGCACGGCGGTTGGATCCGGCATGGCGTCGATGGTTCATTGAAAGCGAACGTTCAATCGGTGTTAGCGGAGGTCTTATCA GC  
GATCTTCGCGGAGGTTATGAGCGGGAAGCCTGAGTTCACCGATCATCTGACTCACAGGCTGAAACACCACCCCGGACAAATCGAAGCGGCGGCGATCATGGAGCACATCCTCGACGGAAGCTCGTA  
CATGAAGCTAGCGCAAAGCTTACGAGATGGATCCGTTACAAAAACCGAAGCAAGACCGTTACGCTCTCCGTACCTCTCCTCAGTGGCTCGGCCCTCAGATCGAAGTATCCGTCACGCCACGAAG  
TCGATCGAGCGTGAGATCAACTCCGTTAACGATAATCCGTTGATCGATGTTTCTAGAAACAAAGCGATTACGCGTGGTAACTTCCAGGGGACTCCGATCGGAGTCTCCATG GATAACACGCGTTTAGC  
GATCGCTTCGATAGGGAAGCTCATGTTCCGCTCAATTCTCGGAGCTTGTAAACGATTTCTATAACAATGGCCTTCTTCAATCTAACGGCTTCAACAATCCAAGCTTGGATTACGGATTCAAAG GAGC  
GGAGATCGCTATGGCTTCGATTGCTCTGAGCTTACGACTTGGCGAATCCAGTTACAAGCCATGTTCAATCAGCTGAGCAACATAACCAAGATGTTAACTCTTTGGGACTCATCTCGTCTCGCAAAAC  
GTCAGAAGCTGTTGACATTTCAAGCTGATGTCGACGACGTTCTTGTGGCTATATGCCAAGCTGTTGATTTGAGACATCTTGAGGAGAATCTGAGACAGACGGTGAAGAACACAGTTTCTCAAG TGG  
CGAAGAAAGTGTTAACCACTGGAGTCAACGGTGAAGCTGCATCCGTCGCGGTTCTGCGAGAAGGACTTGTAAAGGTTGTTGATCGCGAGCAAGTGTTCACGTACGTGGATGATCCTTGTCTCGCCAC  
GTACCCGTTGATGCAGAACTGAGACAAGTTATTGTTGATCAGCTTTGTCTAACGGTGAGACTGAGAAGAACGCAGTACTTCGATCTTCAAAGATCGGAGCTTTCGAGGAAGAGCTCAAGA TGG  
TGCTTCTAAAGAAGTGGATGCGGCTAGAGAGGCTTACGGTAACGGAACGGCGGCGATTCCGAACAGGATTAAGGAATGTCGGTCTTATCCGTTGTATAAGTTCGTGAGGGAAGAGCTTGAACGAA  
GTTGTTGACCGGAGAAAAGTTGTGCTCCGGGAGAGGAGTTTGATAAGGTGTTCACTGCAATGTGTGAAGGTAAGATCATTGATCCATTGATGGAGTGCCTCAAGGAATGGAACGGAGCTCCGATTC  
CTATATGCTAA

>BnaPAL2-1\_C04p025700.1  
MDQINGSVHQNGKTEAMLLCGVVEKTKVVAADPLNHWGAAAEQMKGSHLDEVKRMVEDYRKPVVNLGGETLTIGQVAAISNVGGVVKVELAEASRAGVKASSDWVME SMGKGTDSYGVTTGFGATSHRRT  
KNGAALQTELIRFLNAGIFGNTKETCHTLPESTRAMLRVNTLLQGYSGIRFEILEAITSLLNHNISPSLPLRGTITASGDLVPLSYIAGLLTGRPNKATGPNGESLTGEEAFKKAGITSGFFDLQPK EGLALVN  
GTAVGSGMASMVLFEANVQSVLAEVLSAIFAEVMSGKPEFTDHLTHRLKHHPGQIEAAAIMEHILDGSSYMKLAQKLHEMDPLQKPKQDRYALRTSPQWLGPQIEVIRHATKSIEREINSVNDNPLIDVSRNKAIH  
GGNFQGTPIGVSMNTRLAVAAIGKLMFAQFSELVNDYFNGLPSNLTASNPNSLDYGFKGAEIAMASYCSELQYLANPVTSHVQSAEQHNQDVNSLGLISSRKTSEAVDILRLMSTTFLVAICQAVDLRHL EEN  
LRQTVKNTVSQVAKKVLTTGVNGLHPSRFCEKDLLKVVDRQVFTYVDDPCSATYPLMQKLRQVIVDHALSNGEIEKNVTSIFQKIGAFEELKMLVLPKEVDATREAYANGTAAIPNRIKECRSYPLYKFVRE  
ELGTLKLTGEKVSPGEEFDKVFAMCEGKIIDPLMDCLKEWNGAPIPI\*

>BnaPAL2-1\_C04p025700.1\_BnaEXP  
ATGGATCAGATCAACGGATCAGTTCACCAAAAACGGCAAACCGAAGCGATGTTGTTGTGCGGCGTAGTAGAGAAGACTAAAGTGACGGTGGCGGGCGGATCCGTTAAATGGGGTGCTGCGGGGAG  
CAGATGAAAGGGAGTCAATTTAGATGAGGTGAAGAGGATGGTTGAGGATTACCGTAAACCGGTGGTGAATCTCGGCGGAGAAACTGACGATCGGACAAGTCGCGGGGATCTCGAACGTAGGCGGT  
GGCGTTAAGGTTGAGCTAGCGGAGGCTTCGAGAGCTGGCGTGAAGCTAGCAGCGATTGGGTTATGGAGAGTATGGGTAAAGGTACTGACAGTTACGGTGAACCACTGGGTTTGGAGCTACCTCTC  
ACCGGAGAACCAAAACGGCGCCGCAATTGCAAACCGAACTCATCAGGTTTTTGAACGCCGGAATCTTCGGGAACACGAAGGAGACATGTACACGCTACCGGAATCCGCCACGAGAGCCGCCATGC  
TCGTCGGAGTCAAAACACTCCTCCAAGGATACTCCGGGATCCGATTGAAATCCTCGAAGCGATCACCAGCTCCTCAACCACAACATCTCTCCGTCTCTCCCCCTCCGCGGAACCATAAACCGCCTCC  
GGCGATCTCGTCCCCCTCTCTACATCGCAGGTCTCTCACCGGCCGTCGAACTCAAAGCCACCGGTCCCAACGGTGAATCCCTAACCGGCGAAGAAGCCTTCAAGAAAGCCGGAATCACTTCCG  
GATCTTCGCGGAGGTGATGAGCGGGAAGCCGGAGTTCACCGATCATTGACTCACCGACTAAAACATCACCCCGGACAGATCGAAGCGGCGGCGATCATGGAGCACATCCTCGACGGAAGCTCGTA  
CATGAAGCTAGCGCAAAGCTTACGAGATGGATCCGTTACAAAAACCGAACAAGACCGTTACGCGCTCCGCACGTCTCCTCAATGGCTCGGCCCTCAGATCGAAGTATCCGTCACGCCACGAAG  
TCAATCGAGCGTGAGATCAACTCAGTTAACGATAATCCGTTAATTGACGTTTTCGAGGAACAAAGCGATTACGCGTGGTAACTTCCAGGGGACTCCGATAGGTGTCTCTATGGACAACACAGTTTAGC  
GGTTGCAGCTATTGGGAAGCTCATGTTCCGCTCAGTCTCTGAGTTGGTGAACGACTTCTATAACAACGGTCTTCTTCAATCTAACAGCTTCAACAACCCAAGTTTAGATTACGGATTCAAAGGAGC  
AGAGATCGCCATGGCTTCTACTGCTCTGAGCTTACGACTTTCGCAAGTCAAGTAAAGCCATGTTCAATCAGCTGAACAGCAACCAAGATGTTAACTCTTTAGGACTCATCTCTCTCGTAAGAC  
GTCAGAAGCTGTTGACATTTCTCAGGCTGATGTTACACGCTTCTCTGATGCTGTTGTAAGCTGTTGATTTGAGACATCTTGAGAGAATCTAAGACAAAACCGTGAAGAACACTGTTTCTCAAGTGGC  
GAAGAAAGTGTGACCACTGGAGTCAACGGGGAGCTGCATCCTTACCGGTTCTGTGAGAAGACTTGCTTAAAGGTCGTTGATCGTGAACAAAGTGTTCACATACGTTGACGATCCTTGTAGCGCTACTTA  
CCCGTTGATGCAGAAGTTAAGACAAGTCAATTGTCGATCAGCTTTATCCAATGGTGAGATTGAGAAGAACGCAGTACTTCGATCTTCAAAGATTGGGGCTTTTGGAGGAGCTTAAGATGGTGCT  
TCAAAGGAAGTGGATGCGACTAGAGAGGCTTACGCTAATGGAACGGCGGCGATTCCCAACAGGATTAAGGAATGTCGATCTTATCCGCTGTATAAGTTCGTGAGGGAAGAGCTCGGAACGAAGTTG  
TTGACCGGAGAAAAGTTGCTCTCCGGGAGAGGAGTTTGATAAGGTATTCACTGCAATGTGTGAAGGTAAGATTATTGATCCATTGATGGATTGTCTCAAGGAATGGAACGGAGCTCCCATTCCATA  
TGTTAA

>BnaPAL2-5\_C08p028640.1  
MDQTNQSVHQNGKIEAMLLCGVVEKTKVVAADPLNHWGAAAEQMKGSHLDELKRMVEEYRRPVVNLGGETLTIGQVAAISTAGGGVVKVELAEASRAGVKASSDWVME SMGKGTDSYGVTTGFGATSHRRTK  
NGTALQTELIRFLNAGIFVNTLLQGYSGIRFEILEAITSFLNHNISPSLPLRGTITASGDLVPLSYIAGLLTGRPNKATGPNGESLTAEAEAFKQAGIASGFFDLQPK EGLALVNGTAVGSGMASMVLFEANVQSVLA  
EVLSAIFAEVMSGKPEFTDHLTHRLKHHPGQIEAAAIMEHILDGSSYMKLAQKLHEMDPLQKPKQDRYALRTSPQWLGPQIEVIRHATKSIEREINSVNDNPLIDVSRNKAIHGGNFQGTPIGVSMNTRLAIASIG







MELCEQNNNHVVAVSADPLNWNAAEALKGSHEEVKRMVEDYRKGAVRLGGETLTIGQVAAVASGGVMVELAEARAGVKASSDWMESMNRGTDYSYVTTGFGATSHRRTKQGGALQKELIRFLNAGI  
FGAGAGDSSLTPLKSA TRAAMLVRVNTLLQGYSGIRFEILEAITKLLNNEITPCIPLRGSITASGDLVPLSYIAGLLTGRPN SKAVGPAGETLTASDAFKLAGVPSFFELQPKEGLALVNGTGVGSGLASMVLFEAN  
VLAVLSEVMSAMFAEVMQKGFPEFTDHLTHLKHHPGQIEAAAIMHEILDGSSVFKAEQQLHEDLPLQKPKQDRYALRTPSQWLGPQIEVIRAATKMIEREINSVNDNPLIDVLRNKAIHGGNFQGTPIGVAMDNT  
RLAIAISIGKLMFAQFSELVNDFYNNGLPSNLSGGRNPSLDYGFKGA EIAMASYCSELQFLANPVTNHVQSAEQHNQDVNSLGLISSRKTEEA VEILKLMSTTYLVALCQAVDLRHIENLKKAVKA AVS QVAKRV  
LTVGVN GELHPSRFTERDVLQVVDREHVFSYADDPCSFAYPLMQRLRHVLVDHALED PDREADASASV FQKIGAFETELKVVLPKEVERVRGEYEGGRSVVGNRIKECRSYPLRYFVREELETELLSGESVRS  
PGEVFDKVFSAICDGKVIDPLELCKEWN GAPVPI\*

>BnaPAL4-1\_C05p041260.1\_BnaEXP

ATGGAGTTATGCGAACAAAACAACACCACGTCGTCGCTGCTCCGCCGATCCGTTGAAC TGGAACGCGCGCGCGGAAGCTTTGAAAGGGAGCCACTTGGAGGAGGTGAAACGTATGGTGGAAAGAT  
TACAGAAAAGGGGCGGTGCGGTTAGGAGGAGAGACGCTGACGATTGGTCAAGTTGCCGCCGTTGCTAGCGGAGGAGTGTGGTGGAGCTGGCGGAGGAGGCTCGTGCCGGAGTTAAGGCGAGTA  
GCGACTGGGTGATGGAGAGCATGAACCGTGGCACGGACAGTTATGGAGTCAACCACGGGGTTTGGTGAACCTCCATAGAAGAATAACAAGCGGTGCACTTCAAAGGAGCTTATTAGGTTCTT  
GAACGCCGGGATATTCGGTGCCGGCGCCGGAGACTCGTCACTCACGCTACCTAAGTCGGCGACTAGAGCAGCTATGCTCGTCCGTGTCAACACTCTCTCCAAGGCTACTCTGGAATACGTTTTGAG  
ATTCTTGAAGCCATTACAAGCTTCTTAACAACGAAATCACTCCAATGCATCCCTCTCCGTGGCAGCATCACTGCATCCGGCGACCTTGTCCCTCTCTTACATCGCCGGACTACTCACCGGCCGCTCC  
AATTCAAAGCCGTTGGCTCCCGCCGGTGAGACTCTCACTGCCTCTGATGCCCTTAAGCTAGCCGAGTACCGTCTTTTTCGAGCTGCAGCCAAAGGAAGGACTGGCTCTTGTGAACGGGACAGGGG  
TCGGATCGGGTCTGGCCTCGATGGTTCTGTTTGAGGCCAACGTTTTGGCGGTTTTGCTGAAGTTATGTCTGCCATGTTCCGCGAGGTTATGCAAGGCCAAACCGGAGTTACTGATCATCTAACG CAT  
AAGCTCAAGCACCATCTGGTCAGATTGAAGCCGCTGCGATTATGGAACATAATTACATGGAAGCTTTACGTTAAAGAAGCTCAACAGCTCCATGAACTGGATCCGCTTCAA AACCTAAACAAGAT  
CGGTACGCGCTAAGGACGTCACCACAATGGCTAGGACCACAATCGAAGTGATCAGAGCAGCGACCAAGATGATAGAGCGTGAGATCAACTCGGTCAACGACAACCCCTCTCATAGACGCTCTCCAG AA  
ACAAAGCACTACACGGCGGTAACCTCCAAGGCACGCCATCGGTGTTGCCATGGACAACACCCGCTTAGCCATCGCTCCATCGGCAAACCTCATGTTCCGCGCAGTTCTCCGAGCTCGTGAACGACTT  
CTACAACAACGGCTTGCCTTCAAACCTATCCGGCGGGAGAAACCCTAGCCTCGACTACGGTTTTCAAAGGCGCGGAGATAGCCATGGCCTTACTGCTCCGAGCTCCAGTTCTTGGCTAACCCCG TG  
ACTAACCCAGTCCAGAGCGCCGAGCAGCATAACCAAGCAGTTAACTCGCTAGGGCTGATCTCGAGCCGGAAGACAGAGAAGCTGTTGAGATCCTCAAGCTGATGTTCCACGCACTACTTGGTTGCCG  
TCTGCCAAGCCGTTGATCTGCGTCATATCGAAGAGAATCTCAAGAAAGCGGTTAAAGCCGCTGTGAGCCAGGTGGCGAAACGGGTGTTAACGGTTGGTGTAAACGGCGAGCTGCATCCGTCGAGG TT  
CACGGAGCGGGATGTGCTCCAAGTGGTTGATAGAGAGCACGTGTTCTCTACGCGGACGATCCTTGCAGCTTTGCTTACCCGTTGATGCAGAGGCTTAGGCACGTTCTTGTGGACCACGCTTTAGAG  
GATCCGGACCGGAGGCTGATGCTTCGGCGTCGGTTTTTCAAGATAGGAGCGTTTGGACGGAGCTGAAGGTGGTTTTACCTAAGGAGGTGGAGCGTGTAGGGGTGAGTATGAGGGAGGGCG  
GTCGGTTGTGGTAACCCGATTAAGGAATGTCGGTCTTATCCGTTGTACCGGTTTTGAGGGAGGAGCTGGAGACTGAGCTGTTGAGTGGAGAGAGTGTAGGTCGCCCGGTGAAGTGTTTGATAAA  
GTGTTCTCGCGATTGTGATGGGAAGGTTATTGATCCTTGTGGAGTGTCTCAAGGAGTGAACGGAGCTCCGGTTCCGATCTGTTGA

>BnaPAL3-2\_A04p012590.1

MEFCQPNKNNGSASSDPLNWNVAEALKGSHEVEDVKMVEDYRKGTVRLGGETLTIGQVAAVASKGTTVELLEEARAGVKASSEWVME SINRGTDY GITTGFGSSRRRTNQGAALQKELIRYLN TGIFAT  
GDEDDVLSNILPRPATRAAMLIRVNTLLQGYSGIRFEILEAITKFLNHKILRLPLRGTITASGDLVPLSYIAGLLTGRPNRSR SVGPSDEILTALEAFKLAGISSPFELRPKEGLALVNGTAVGSAMASIVLYEANVLAV  
FSEVASAMFVEVMHKGKPEFTDHLVHLKHHPGQIEAAAIMHEILDGSSVFKAEIRLHEIDLQKPKQDRYALRTPSQWLGPQIEVIRAATKMIEREINSVNDNPLIDVLRNKAIHGGNFQGTPIGVAMDNARLAIGS  
IGKLMFAQFTEL VNDFYNNGLPSNLSGGRNPSLDYGFKGA EIVPMAAYCSELQFLANPVTNHVQSTEQHNQDVNSLGLVSSHKTA EAVNILKLSMATYLVALCQAYDLRHLIEDNLKETIKAVVNQT AERHVFTLS  
KPFLEQNILGVIDREYVFSYVYDLSLTPMLMQKLR SILFDHALAEPEHETDSGFRKIGTFETELKSLHNEVERVWTEYKGNFV ANRIKECRSYPLRYFVREELETRLLTGGSVRTPGEDFVEVFKAISKGKLI  
DPLFECLKEWNGAPIPI\*

>BnaPAL3-2\_A04p012590.1\_BnaEXP

ATGGAATTTTGTCAACCAAACAACAAACCGGAAGTGGCTAGTGATCCACTTAATTGGAACGTAGCGGCCGAGGCTTTGAAAGGGAGCCACGTGGAGGATGTGAAGAAGATGGTGGAGGATTATA  
GGAAAGGAACGGTGC GGCTCGGTGGAGAGACGCTACTATCGGTGAGTTGCGGCCGTTGCGAGCAAAGGGACGACGGTGGAGCTTTTGGAGGAGGCTCGTGCCGGCGTGAAGGCTAGTAGTGA  
GTGGGTGATGGAAAGCATTAAACCGTGGCAGGACACTTATGGAATCAACCTAGGATTTGGTTCTTCTCTCGTAGGAGGACCAATCAAGGTGCTGCTTTCAA AAAAGAGCTTATTAGGTACTTGAACAC  
CGGAATATTCGCTACAGCCGACGAAGATGACGTTTTGTCAAACATTTCTTCCGTCGGGCAACAAGAGCGGCGATGCTCATCCGTGTCAACACACTCCTCCAAGGCTACTCCGGTATACGCTTCGAAA  
TCCTTGAAGCCATCACA AAGTTCCTCAACCACAAAATCACACTGCGCCTCCCTCTCCGAGGCACCAACACCGCTCTGGTGACCTCGTTCCTCTATCGTACATCGCCGGTCTCCTCACCGGACGGCC  
AACTCCCGATCCGTGGGTCCATCCGATGAGATCCTTACTGCCTTAGAGCCTTCAAGCTAGCTGGAATATCTTCTCCTTTTGGAGCTCCGGCCTAAAGAAGGGCTTGC GCTCGTGAACGGCACCGCGG  
TTGGGTCCGCTATGCCCTCAATAGTACTATACGAGGCCAACGTTCTGGCAGTTTTTCTGAAGTTGCTTCCGCCATGTTTGGTGGAGTTATGCTGGAAGAAACCCGAGTTTACCGATCATCTTGTGCATA  
AACTCAAGCACCATTCCTGTCAGATCGAAGCCGCGCAATCATGGAACATCTTAGACGGAAGCTCTTTGTCAAAGAAGCTATACGTCTCCATGAGATTGATCCGCTCAA AAAACCTAAACAAGATC  
GCTACGCTCTGCGAACATCGCCACAGTGGCTTGGACCGCAGATTGAGGTGATCAGAGCCGCAAGAAATGATTGAACGAGAGATAAACTCTGTCAACGATAAACCCTTAAATCGATGTGCTCGGAAAC  
AAAGCTATCCACGGTGGGAATTTCCAGGGGACACCAATAGGTGTAGCCATGGACAACGCTCGTCTGGCCATTGTTCCATCGGGAACCTAATGTTTGC GCAATTCACGGAACCTCGTCAATGATTTCTA  
TAACAACGGTCTACCTTCGAATCTATCCGGTGGGAGAAACCCTAGCCTTGACTACGGGTTCAAAGGCGCGGAAGTCCCATGGCTGCTTATGTTCCGAGCTTCAGTTCTTGGCTAACCCCTGTGACAA  
ACCATGTCCAAGCACTGAGCAACATAATCAAGATGTTAACTCTTGGTTTTGGTCTCCAGCCACAAGACTGCAGAAGCTGTGAATATCTCAAGCTTATGTCAGCTACTTACTTAGTAGCTTTA TGCCA  
AGCCTATGATCAAGACATCTTGAAGATAATCTCAAGCAACGATTAAGGCGGTTGTGAACCAAACCGCGGAAAGACACGATTTACGCTCAGCAACCCGTTCC TCGAACAGAACATCCTCGGAGTAT  
CGACCGCAATATGCTTTTTCTATGTTTATGACCTAAGCAGCCTCACTAACCCCTCTAATGCAGAAGCTGAGAAGCATTCTTTTCGACCATGCTTTAGCTGAACCGGAACATGAGACGGATTCCGGTTTT  
TCGAAAAATAGGAACATTCGAACAGAGCTGAAATCTTCTACATAACGAAGTTGAAAGAGTGTGGACCGAGTATGAAAGGGTAACTTTGTGTGGCTAACCGGATCAAAGAGTGTAGATCGTATCC

GTTGTACCGTTTTGTACGGGAGGAGCTAGAGACGAGGCTACTAACCGGAGGGAGTGTCCGGACACCAGGTGAAGATTTTCGACGAAGTTTTTAAAGCCATCTCTAAGGGAAAACCTCATAGATCCTCTGT  
TTGAATGCCTCAAGGAATGGAACGGAGCTCCAATCCCAATCTCCTAA

>BnaPAL3-1\_C04p034430.1

MLIRVNTLLQGYSIRFEILEAITKFLNHKITPRLPLRGTITASGDLVPLSYIAVLLTGRPNRSRVSVPSEILAALEAFKLAGISSPFELRPKEGLALVNGTAVGMSAMASIVLYEANVLAVFSEVASAMFAEVMHGKPE  
FSDHLVHKLKHHPQMEAAAITEHILDGSSFVKEAIRLHEIDPLQKPKQDRYALRTPQWLGPQIEVIRAATKMIEREINSVNDNPLIDVSRNKAIHGGNFQGTPIGVAMDNRALIGSIGKLMFAQFTELVNDFYN  
NGLPSNLSGGRNPSLDYGFKGAEVPMAAAYSELQFLANPVTNHVQSTEQHNQDVNSLGLISSHKTAEAVNILKMSATYLVALCQAYDLRHLEDNLKETIKAVVNQTAEKHAFTLSKPFIEQNILGVIDREYVFSY  
VYDLSLANPLMQKLRSVLFDHALAEPEHETDSGFRKIGTFETELKSLLPNEVERVWTEYENGNFVANRIKECRSYPLSRFVREELETRLLTGGSVRTPGEDFDEVFKAISKGKLIDPLFECLKEWNGAPIPIS\*

>BnaPAL3-1\_C04p034430.1\_BnaEXP

ATGCTCATCCGTGTCAACACACTCCTCCAAGGCTACTCCGGTATACGCTTCGAAATCCTTGAAGCCATCACAAAGTTCTCAACCACAAAATCACACCGCGCCTCCCTCTCCGAGGCACCATCACCGC  
CTCTGGTGACCTCGTTTCTCTATCGTACATCGCCGTTCTCCTCACCGGACGGCCCAACTCCCGATCCGTGGGTCCATCCGGTGAGATCCTTGCCGCCTTAGAGGCCTTCAAGCTAGCTGGAATATCTT  
CTCCTTTTGAGCTCCGGCCTAAAGAAGGGCTTGCCTCGTGAACGGCACCGCGGTTGGGTCTGCTATGGCCTCAATAGTGCTATACGAGGCCAACGTTTTGGCAGTGTC TCGGAAGTTGCTTCTGC  
CATGTTTGCCGAGGTTATGCATGGGAAACCCGAGTTTTCCGATCATCTTGTGCATAAACTCAAGCACCATCCTGGTCAGATGGAAGCCGCGGCAATCACGGAACATATCTTAGACGGAAGCTCTT TTGT  
CAAAGAAGCTATACGTCTCCACGAGATTGATCCGCTCCAAAAACCTAAACAAGATCGCTACGCTCTGCGAACATCGCCACAGTGGCTTGGACCTCAGATTGAGGTGATCCGAGCCGCGACGAAAATGA  
TCGAACGAGAGATAAACTCTGTCAACGATAACCCCTTAATCGATGTGTGCGGAAATAAAGCTATCCACGGTGGGAATTTCCAAGGGACACCAATAGGTGTGCGCCATGGACAACGCTCGTCTAGCCATT  
GGTTCCATCGGGAAACTAATGTTTGCAGTTCACGGAACCTCGTCAATGATTTCTACAACAACGGTCTACCTTGAATCTATCCGGTGGGAGAAACCTAGCCTTGACTACGGGTTTTAAAGGCGCGGA  
AGTCCCATGGCTGCTTATTATCCGAGCTTCAAGTTCTTGGCTAACCTGTGACAAACCATGTCCAAGCACTGAACAACATAATCAAGATGTTAACTCTCTTGGTTTGATCTCCAGCCACAAAACCTGCC  
GAAGCTGTGAATATCCTCAAGCTTATGTCAGCTACTTACTTAGTAGCTTTATGCCAAGCCTATGATCTAAGACATCTTGAAGACAATCTCAAGGAAACGATTAAGCGGTTGTGAACCAAACCGCGGAAA  
AACACGCATTCCTCTCAGCAAACCGTTATCGAACAGAACATCCTCGGAGTTATCGACCGCAATATGCTTTTCTATGTTTATGACCTAAGTAGCCTCGCTAACCCCTCTAATGCAGAAGCTG AGAA  
GCGTTCTTTTCGACCATGCTTTAGCTGAACCGGAGCATGAGACGGATTTCGGGTTTTCGAAAAATAGGAACGTTTCGAAACAGAGCTGAAATCTCTTCTACCTAACG AAGTTGAAAGAGTGTGGACCGAG  
TACGAAAATGGTAACTTTGTTGTGGCCAAACCGAATCAAAGAGTGTAGATCGTATCCGTTGTCCCGTTTTGTACGGGAGGAGCTAGAGACGAGGCTACTAACCGGAGGGAGTGTCCGGACACCAGG AG  
AAGATTTTGACGAAGTTTTTAAAGCCATCTCTAAGGGAAAACCTCATAGATCCTCTGTTTGAATGTCTCAAAGAATGGAACGGAGCTCCAATTCCAATCTCCTAA

**Supplementary Table 7: Organ-specific expression of *B. napus* Express 617 PAL candidate genes.** The median transcripts per millions (TPMs) of each PAL candidate gene per organ is listed. Paired-end RNA-Seq data generated in this study derived from seeds (35 DAF) of Express 617 (E617) and SGD14 (S14) are marked with an asterisk. Publicly available paired-end *B. napus* RNA-Seq data sets were used for the remaining organs. The number of analysed data sets per organ is stated via (n = X). The colour gradient from white to blue indicates the expression strength with dark blue symbolising high expression. DAF, days after flowering; DAP, days after pollination; SAM, shoot apical meristem.

|                          | PAL4-1<br>C05p041260.1 | PAL4-2<br>A05p031299.1 | PAL3-1<br>C04p034430.1 | PAL3-2<br>A04p012590.1 | PAL2-1<br>C04p025700.1 | PAL2-2<br>A04p005140.1 | PAL2-3<br>R186_chrC06p000250.1 | PAL2-4<br>A07p016620.1 | PAL2-5<br>C08p028640.1 | PAL2-6<br>A09p036110.1 | PAL1-1<br>C04p009110.1 | PAL1-2<br>A05p007980.1 | PAL1-3<br>C04p046000.1 | PAL1-4<br>A04p023010.1 |
|--------------------------|------------------------|------------------------|------------------------|------------------------|------------------------|------------------------|--------------------------------|------------------------|------------------------|------------------------|------------------------|------------------------|------------------------|------------------------|
| SAM (n=16)               | 1.3                    | 8.4                    | 0.0                    | 0.0                    | 2.3                    | 0.6                    | 0.0                            | 0.0                    | 0.0                    | 2.2                    | 4.2                    | 1.5                    | 8.7                    | 0.1                    |
| Anther prophase 1 (n=12) | 0.1                    | 0.8                    | 0.0                    | 0.0                    | 3.1                    | 2.4                    | 0.0                            | 0.0                    | 0.0                    | 3.7                    | 0.1                    | 0.0                    | 0.1                    | 0.2                    |
| Anther bolting (n=6)     | 0.7                    | 54.0                   | 0.0                    | 0.1                    | 3.0                    | 1.8                    | 0.0                            | 0.0                    | 0.0                    | 4.5                    | 27.9                   | 14.8                   | 19.9                   | 0.0                    |
| Anther flowering (n=4)   | 0.0                    | 70.0                   | 0.0                    | 0.0                    | 9.0                    | 5.8                    | 0.0                            | 0.0                    | 0.0                    | 13.1                   | 33.1                   | 31.6                   | 25.8                   | 20.5                   |
| Stamen (n=1)             | 0.1                    | 30.5                   | 0.0                    | 0.0                    | 0.4                    | 1.0                    | 0.0                            | 0.0                    | 0.0                    | 1.1                    | 9.3                    | 1.5                    | 13.4                   | 4.1                    |
| Ovule (n=1)              | 0.8                    | 135.2                  | 0.0                    | 0.0                    | 18.3                   | 20.6                   | 0.0                            | 0.0                    | 0.0                    | 19.5                   | 25.4                   | 9.1                    | 72.7                   | 17.5                   |
| Pistil (n=3)             | 7.1                    | 11.9                   | 0.0                    | 0.0                    | 4.6                    | 2.8                    | 0.0                            | 0.0                    | 0.0                    | 6.7                    | 12.2                   | 7.0                    | 26.4                   | 3.7                    |
| Sepal (n=1)              | 0.0                    | 2.0                    | 0.0                    | 0.0                    | 7.8                    | 5.9                    | 3.1                            | 0.0                    | 0.0                    | 19.6                   | 6.9                    | 0.0                    | 5.9                    | 0.0                    |
| Petal (n=2)              | 217.4                  | 29.2                   | 0.0                    | 0.0                    | 4.2                    | 1.2                    | 0.8                            | 0.6                    | 0.0                    | 3.7                    | 37.3                   | 232.9                  | 7.4                    | 0.0                    |
| Siliques 10-20DAF (n=13) | 9.4                    | 22.3                   | 0.0                    | 0.0                    | 10.3                   | 6.0                    | 0.0                            | 0.0                    | 0.0                    | 12.8                   | 29.1                   | 12.1                   | 13.7                   | 7.7                    |
| Siliques 25DAF (n=6)     | 6.4                    | 20.2                   | 0.0                    | 0.0                    | 11.1                   | 11.3                   | 0.0                            | 0.0                    | 0.0                    | 18.1                   | 42.6                   | 3.3                    | 12.5                   | 23.8                   |
| Siliques 30DAF (n=6)     | 10.7                   | 33.8                   | 0.0                    | 0.0                    | 13.7                   | 13.1                   | 0.0                            | 0.0                    | 0.0                    | 18.7                   | 44.7                   | 6.1                    | 11.0                   | 17.6                   |
| Siliques 40DAF (n=2)     | 6.5                    | 22.2                   | 0.0                    | 0.0                    | 7.3                    | 8.1                    | 0.0                            | 0.0                    | 0.0                    | 10.2                   | 19.5                   | 11.9                   | 2.9                    | 6.4                    |
| Seed_35DAF_E617* (n=3)   | 54.9                   | 87.7                   | 0.0                    | 0.0                    | 9.6                    | 11.7                   | 0.0                            | 0.0                    | 0.0                    | 18.1                   | 19.4                   | 31.2                   | 6.9                    | 6.6                    |
| Seed_35DAF_S14* (n=3)    | 0.7                    | 217.0                  | 0.0                    | 0.0                    | 18.6                   | 15.2                   | 0.0                            | 0.0                    | 0.0                    | 18.2                   | 34.1                   | 54.2                   | 6.5                    | 12.6                   |
| Seed coat 14DAF (n=7)    | 0.9                    | 2.5                    | 0.0                    | 0.0                    | 7.7                    | 4.9                    | 0.0                            | 0.0                    | 0.0                    | 5.4                    | 1.5                    | 0.0                    | 3.7                    | 1.5                    |
| Seed coat 21DAF (n=6)    | 38.6                   | 69.5                   | 0.0                    | 0.0                    | 19.5                   | 14.1                   | 0.0                            | 0.0                    | 0.0                    | 16.8                   | 24.7                   | 0.0                    | 34.1                   | 12.2                   |
| Seed coat 28DAF (n=6)    | 120.7                  | 151.6                  | 0.0                    | 0.1                    | 19.2                   | 14.0                   | 0.0                            | 0.0                    | 0.0                    | 20.9                   | 42.5                   | 0.0                    | 95.5                   | 42.2                   |
| Seed coat 35DAF (n=6)    | 92.4                   | 90.8                   | 0.0                    | 0.1                    | 18.3                   | 16.2                   | 0.0                            | 0.0                    | 0.0                    | 18.0                   | 48.4                   | 0.0                    | 91.0                   | 42.0                   |
| Seed coat 42DAF (n=6)    | 111.9                  | 82.6                   | 0.0                    | 0.0                    | 14.6                   | 13.2                   | 0.0                            | 0.0                    | 0.0                    | 21.4                   | 245.5                  | 0.0                    | 63.1                   | 27.8                   |
| Embryo (n=6)             | 13.5                   | 20.4                   | 0.0                    | 0.0                    | 10.5                   | 9.8                    | 0.0                            | 0.0                    | 0.0                    | 25.4                   | 9.5                    | 3.2                    | 2.1                    | 10.9                   |
| Endosperm (n=8)          | 15.2                   | 33.4                   | 0.0                    | 0.0                    | 4.7                    | 4.1                    | 0.0                            | 0.0                    | 0.0                    | 5.5                    | 3.1                    | 3.0                    | 10.4                   | 1.3                    |
| Seedling (n=9)           | 0.2                    | 7.5                    | 0.0                    | 0.1                    | 13.2                   | 10.5                   | 0.0                            | 0.0                    | 0.0                    | 23.6                   | 15.5                   | 10.9                   | 18.6                   | 0.0                    |
| Stem (n=19)              | 126.9                  | 227.9                  | 0.0                    | 0.0                    | 29.0                   | 25.1                   | 0.0                            | 0.0                    | 0.0                    | 67.9                   | 131.6                  | 59.7                   | 117.5                  | 19.9                   |
| Shoot (n=2)              | 2.1                    | 8.2                    | 0.0                    | 0.0                    | 1.8                    | 0.9                    | 0.0                            | 0.0                    | 0.0                    | 3.9                    | 4.9                    | 2.3                    | 5.4                    | 6.0                    |
| Shoot apex (n=2)         | 11.7                   | 8.1                    | 0.0                    | 0.0                    | 4.6                    | 1.6                    | 0.0                            | 0.0                    | 0.0                    | 6.4                    | 4.3                    | 1.1                    | 3.4                    | 1.3                    |
| Root seedling (n=13)     | 8.4                    | 7.6                    | 0.0                    | 0.5                    | 18.4                   | 14.1                   | 0.0                            | 0.0                    | 0.0                    | 56.7                   | 44.3                   | 25.8                   | 31.2                   | 3.6                    |

|                   |     |      |     |     |           |           |     |     |     |           |           |      |           |      |
|-------------------|-----|------|-----|-----|-----------|-----------|-----|-----|-----|-----------|-----------|------|-----------|------|
| Root 30DAP (n=20) | 6.5 | 7.4  | 0.0 | 0.6 | 66.3      | 55.6      | 0.0 | 0.0 | 0.0 | 82.5      | 92.6      | 21.6 | 77.8      | 54.7 |
| Root 60DAP (n=2)  | 0.5 | 13.8 | 0.0 | 0.2 | 132.<br>0 | 148.<br>0 | 8.0 | 0.0 | 0.0 | 252.<br>5 | 290.<br>0 | 17.5 | 364.<br>5 | 1.0  |

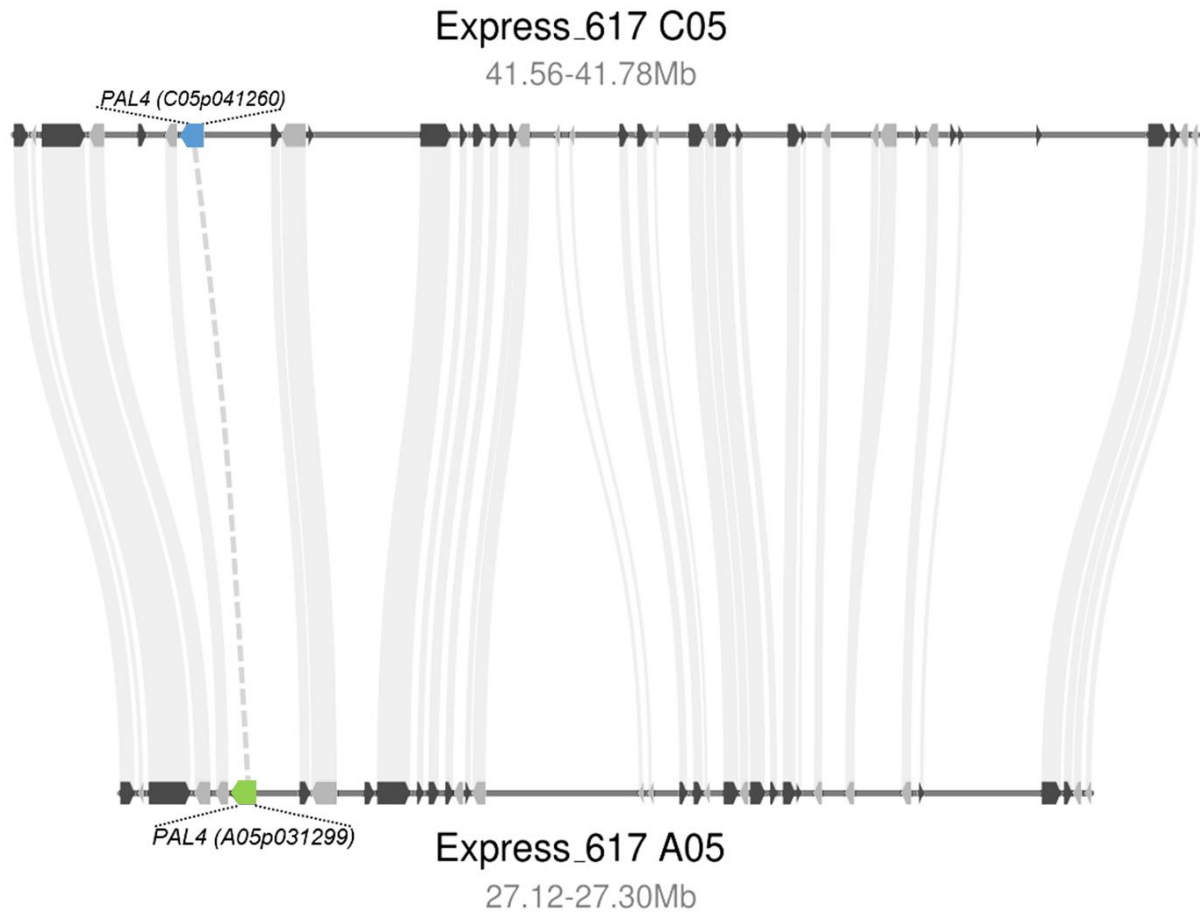

**Supplementary Figure 5: *B. napus* Express 617 carries a previously not annotated A05 *PAL4* homolog and shows high local synteny between the homologous A05 region to the C05 region.** The synteny plot was constructed based on the Express 617 assembly and covers the C05 region (41,56-41,78 million base pairs (Mb)) located inside the major low lignin QTL, as well as the corresponding homologous A05 region ranging from 27,12-27,30 million base pairs (Mb). Genes located on the forward strand are marked in black, while genes located on the reverse strand are marked in grey. The *PAL4* copy on C05 is highlighted in blue, while the manually annotated *PAL4* copy on A05 is marked in green. Respective novel syntenic genes are marked by a dashed line.



**Supplementary Figure 6: The CDS with UTRs and upstream sequences of the A05, A05'', and C05 *PAL4* homologs.** The CDS (light yellow box), UTRs (orange boxes) and 5'UTR upstream sequences (grey boxes) of the A05, A05'' and C05 *PAL4* homologs are shown. The A05'' *PAL4* sequence is identical to the A05 *PAL4* sequence except for the positions marked with red and purple rectangles. Subgenome-specific differences between A05 and A05'' *PAL4* to the C05 *PAL4* sequence can thus be inferred by all remaining positions lacking an asterisk underneath the alignment. Positions marked with a red rectangle stress A05'' specific SNPs, while purple rectangles mark SNPs, where the A05'' *PAL4* homolog carries the C05 *PAL4* allele. If one of these SNPs results in an amino acid exchange in the A05'' *PAL4* sequence compared to the A05 *PAL4* sequence a black box underneath each codon shows the respective exchange, e.g. at position 586 a valine was exchanged by isoleucine in the A05'' amino acid sequence. Amino acid exchanges derived from subgenome-specific SNPs are shown in cyan rectangles, e.g. at position 2, the aspartic acid (D) of A05 *PAL4* is changed to glutamic acid (E) in the C05 *PAL4*. Clustal Omega (Sievers et al. 2011) was applied for the construction of the sequence alignment.
