# Supplementary material for: Homoeologous non-reciprocal translocation explains a major QTL for seed lignin content in oilseed rape (Brassica napus L.)
Source: PubMed Central journal article supplement (PMC10345078; doi:10.1007/s00122-023-04407-w), 2023-07-13
Supplement: 122_2023_4407_MOESM8_ESM.pdf [file 122_2023_4407_MOESM8_ESM.pdf]

## **Homoeologous non-reciprocal translocation explains a major QTL for seed lignin content in oilseed rape (*Brassica napus* L.)**

Hanna Marie Schilbert<sup>1,2,†</sup>, Karin Holzenkamp<sup>3,†</sup>, Prisca Viehöver<sup>1</sup>, Daniela Holtgräwe<sup>1</sup>, Christian Möllers<sup>3</sup>

<sup>1</sup> Genetics and Genomics of Plants, CeBiTec and Faculty of Biology, Bielefeld University, Bielefeld, Germany

<sup>2</sup> Graduate School DILS, Bielefeld Institute for Bioinformatics Infrastructure (BIBI), Faculty of Technology, Bielefeld University, Germany

<sup>3</sup> Department of Crop Sciences, Division of Crop Plant Genetics, Georg-August-University, Göttingen, Germany

† These authors contributed equally to this work.

Corresponding author: Hanna Marie Schilbert, [hschilbe@cebitec.uni-bielefeld.de](mailto:hschilbe@cebitec.uni-bielefeld.de)

**Theoretical and Applied Genetics**

|                   |                                                              |    |    |     |
|-------------------|--------------------------------------------------------------|----|----|-----|
|                   |                                                              | P2 | P1 |     |
| Express617_C05_RB | GCTTAAATCTCAAACACGGGCTTGGGTA CAAGTTTACCCTAACGGAGACGTCTTGAAGG |    |    | 60  |
| Express617_A05_RB | GCTGAATCTCAAACACGGGCTTGGGTACCAAGTTTACCCTAACGGTGACGTCTTGAAGG  |    |    | 60  |
| SGDH14_C05_RB     | GCTGAATCTCAAACACGGGCTTGGGTACCAAGTTTACCCTAACGGTGACGTCTTGAAGG  |    |    | 60  |
| SGDH14_A05_RB     | GCTGAATCTCAAACACGGGCTTGGGTACCAAGTTTACCCTAACGGTGACGTCTTGAAGG  |    |    | 60  |
|                   | *** **                                                       |    |    |     |
|                   | R1                                                           |    |    |     |
| Express617_C05_RB | CTCTTGGATTCAGGGTTGGGAGAAGGGCCAGGGAAGTACACTTGGGGTAACGGGAACAT  |    |    | 120 |
| Express617_A05_RB | CTCTTGGATTCAGGGTTGGGAGAAGGGCCAGGGAAGTACACGTGGGGTAACGGGAACAT  |    |    | 120 |
| SGDH14_C05_RB     | CTCTTGGATTCAGGGTTGGGAGAAGGGCCAGGGAAGTACACTTGGGGTAACGGGAACAT  |    |    | 120 |
| SGDH14_A05_RB     | CTCTTGGATTCAGGGTTGGGAGAAGGGCCAGGGAAGTACACGTGGGGTAACGGGAACAT  |    |    | 120 |
|                   | ***** **                                                     |    |    |     |
| Express617_C05_RB | CTATCTTGGGGATATGAAAGGTGGGAA                                  |    |    | 147 |
| Express617_A05_RB | CTATCTTGGGGATATGAAAGGTGGGAA                                  |    |    | 147 |
| SGDH14_C05_RB     | CTATCTTGGGGATATGAAAGGTGGGAA                                  |    |    | 147 |
| SGDH14_A05_RB     | CTATCTTGGGGATATGAAAGGTGGGAA                                  |    |    | 147 |
|                   | *****                                                        |    |    |     |

<G> 3' Anchor R1 reverse primer  
 [A/C] 3' SNP P1 forward primer; alternative [A/T] 3' SNP P2 forward primer  
 GAAG-GGTT 22 bp non subgenome-specific region

**Supplementary Figure 7: Anchored KASP assay design for homoeologous non-reciprocal translocation in SGD14.** An anchored KASP INDEL marker was designed to detect the A05/C05 insertion using the marked mismatches in both sequences on the right border.

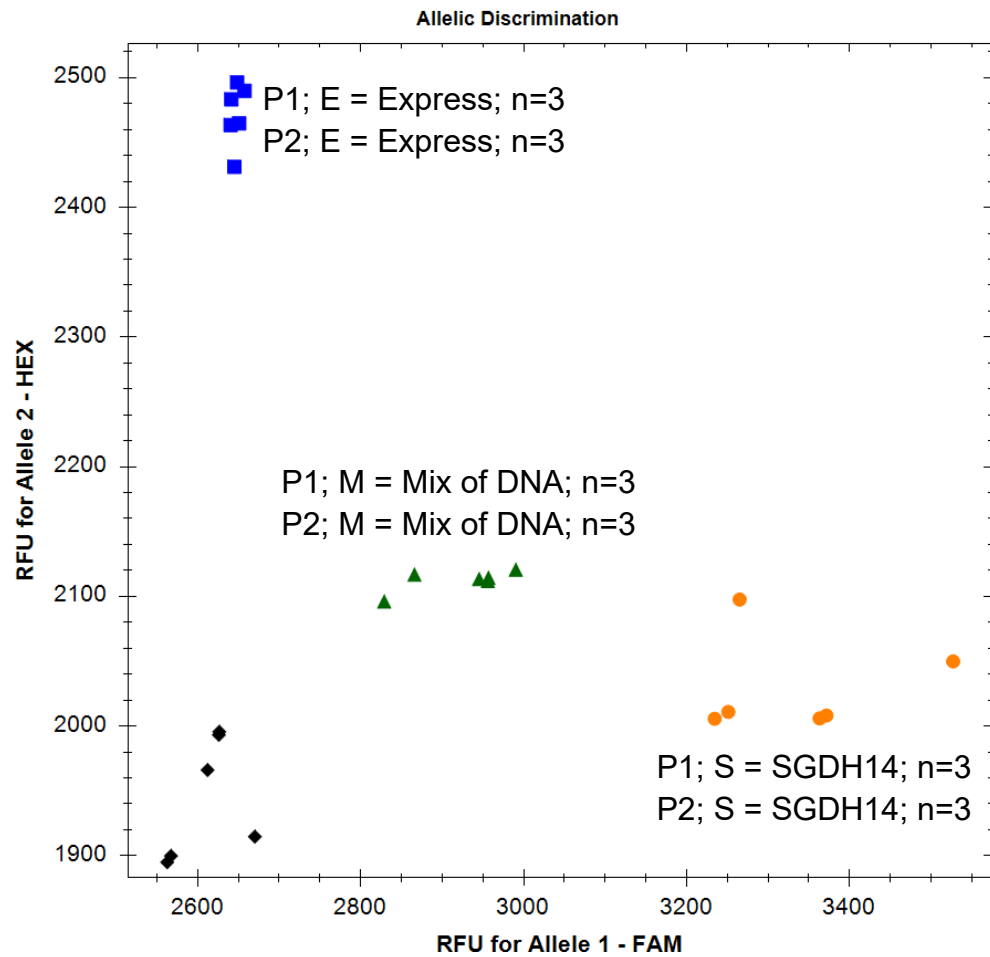

| Well | Sample | Call         | Type | RFU1 | RFU2 |
|------|--------|--------------|------|------|------|
| A01  | P1,S   | Allele 1     | Auto | 3234 | 2006 |
| A02  | P1,S   | Allele 1     | Auto | 3265 | 2098 |
| A03  | P1,S   | Allele 1     | Auto | 3251 | 2011 |
| A04  | P1,E   | Allele 2     | Auto | 2645 | 2431 |
| A05  | P1,E   | Allele 2     | Auto | 2651 | 2465 |
| A06  | P1,E   | Allele 2     | Auto | 2640 | 2464 |
| A07  | P1,M   | Heterozygote | Auto | 2866 | 2117 |
| A08  | P1,M   | Heterozygote | Auto | 2957 | 2114 |
| A09  | P1,M   | Heterozygote | Auto | 2829 | 2096 |
| A10  | Wasser | No Call      | Auto | 2612 | 1966 |
| A11  | Wasser | No Call      | Auto | 2567 | 1900 |
| A12  | Wasser | No Call      | Auto | 2670 | 1915 |
| B01  | P2,S   | Allele 1     | Auto | 3363 | 2006 |
| B02  | P2,S   | Allele 1     | Auto | 3372 | 2008 |
| B03  | P2,S   | Allele 1     | Auto | 3527 | 2050 |
| B04  | P2,E   | Allele 2     | Auto | 2641 | 2483 |
| B05  | P2,E   | Allele 2     | Auto | 2658 | 2490 |
| B06  | P2,E   | Allele 2     | Auto | 2648 | 2496 |
| B07  | P2,M   | Heterozygote | Auto | 2990 | 2121 |
| B08  | P2,M   | Heterozygote | Auto | 2956 | 2112 |
| B09  | P2,M   | Heterozygote | Auto | 2945 | 2113 |
| B10  | Wasser | No Call      | Auto | 2626 | 1993 |
| B11  | Wasser | No Call      | Auto | 2627 | 1996 |
| B12  | Wasser | No Call      | Auto | 2563 | 1895 |

**Supplementary Figure 8: Anchored KASP assay results for homoeologous non-reciprocal translocation in SGD14.** KASP anchored SNP result of Express 617 (blue rectangles), SGD14 (orange dots), and a mixed samples of both genotypes (green triangles) were used for KASP assay. The black diamonds mark the water controls. Two forward primers were tested (P1 and P2), which performed equally well. RFU, relative fluorescence units.
